# Supplementary material for: CCR2 Is Dispensable for Disease Resolution but Required for the Restoration of Leukocyte Homeostasis Upon Experimental Malaria-Associated Acute Respiratory Distress Syndrome
Source: PubMed Central journal article supplement (PMC7921736; doi:10.3389/fimmu.2020.628643), 2021-02-16

### **Supplementary methods: gating strategies**

Lung and spleen cells were isolated and stained for flow cytometry. After exclusion of red blood cells, debris and doublets of cells, all live cells (LD<sup>-</sup>) were gated. The leukocytes were identified by CD45 staining. For the lymphoid panel on the lungs, the autofluorescent alveolar macrophages were gated out by plotting LD versus FSC-A as those cells otherwise result in false positive staining for lymphoid cell markers. For each gating strategy, the gating of an uninfected control and of a *PbNK65*-infected mice on day 8 p.i. is shown below. LD, Live/dead.

# Gating strategy for the lymphoid panel for pulmonary leukocytes

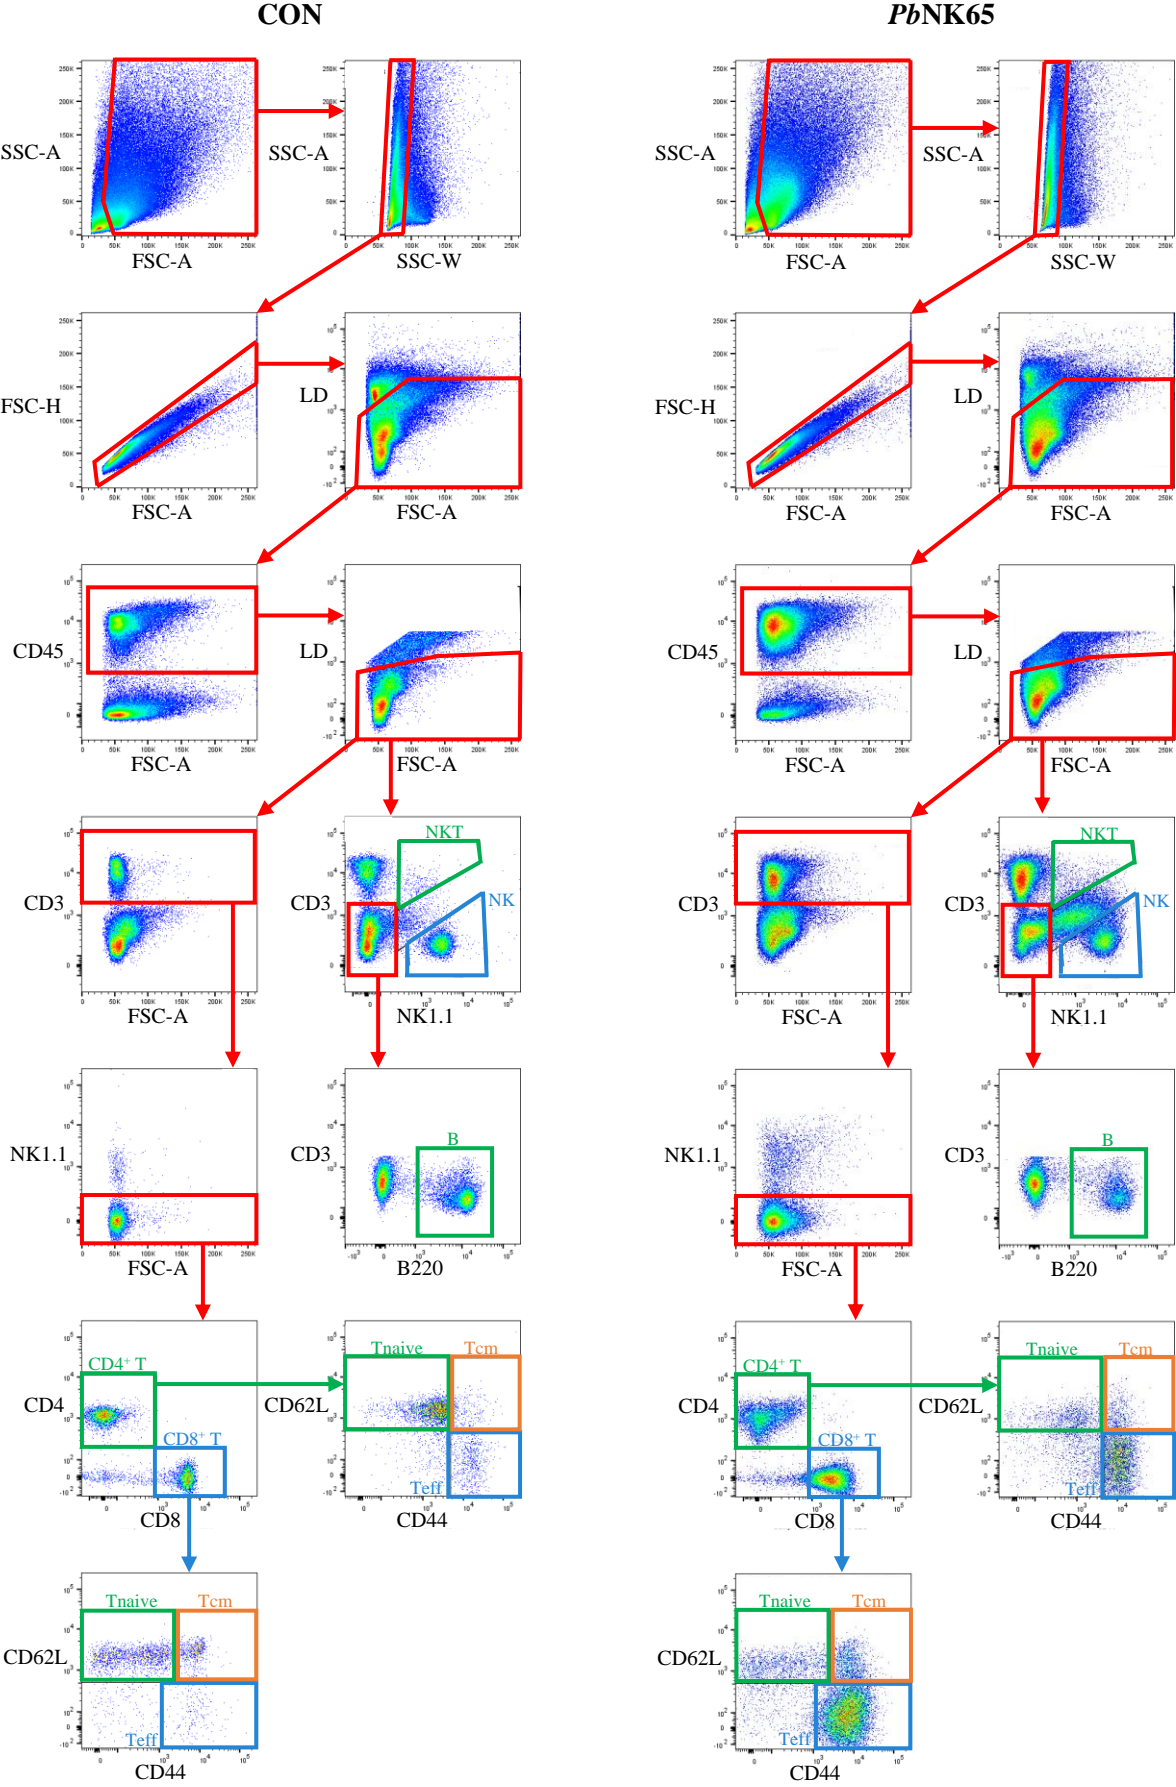

# Gating strategy for the lymphoid panel for splenocytes

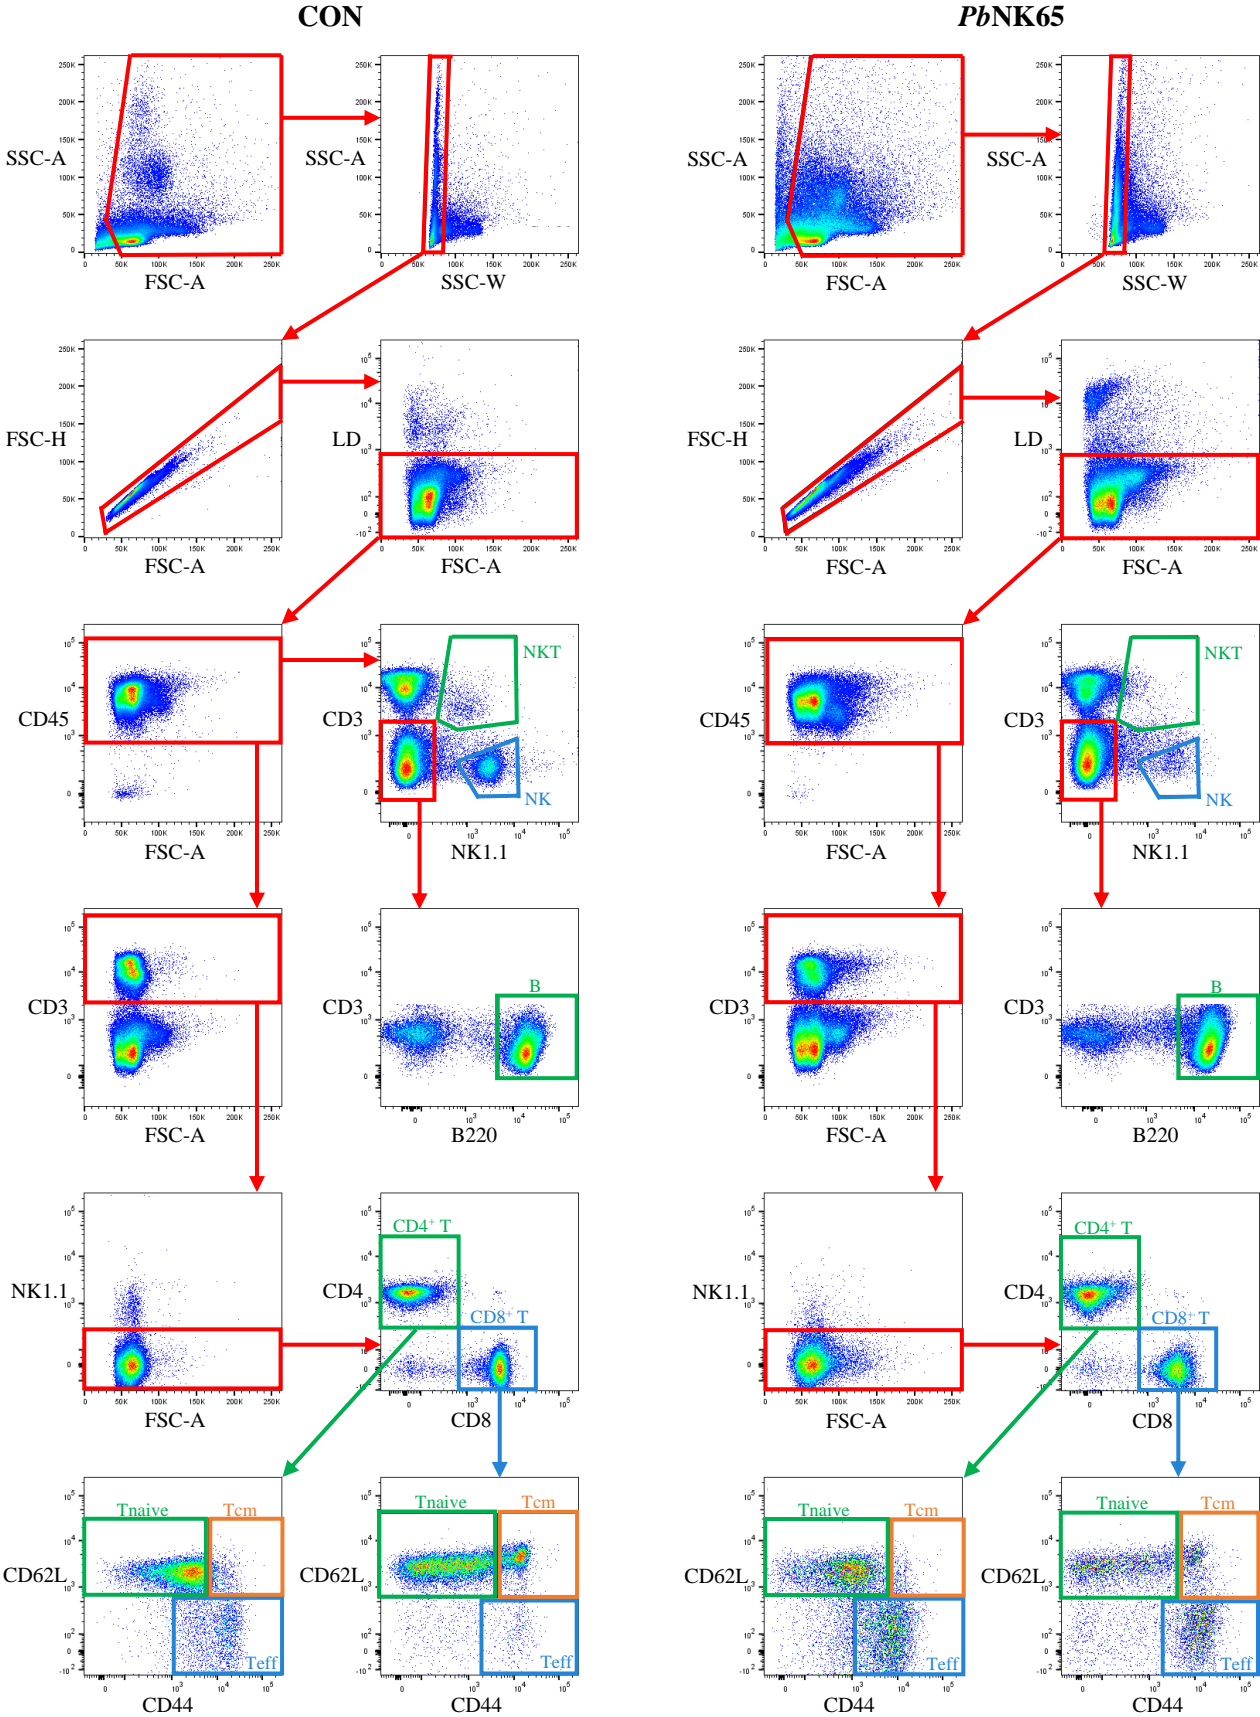

# Gating strategy for the myeloid panel for pulmonary leukocytes

CON

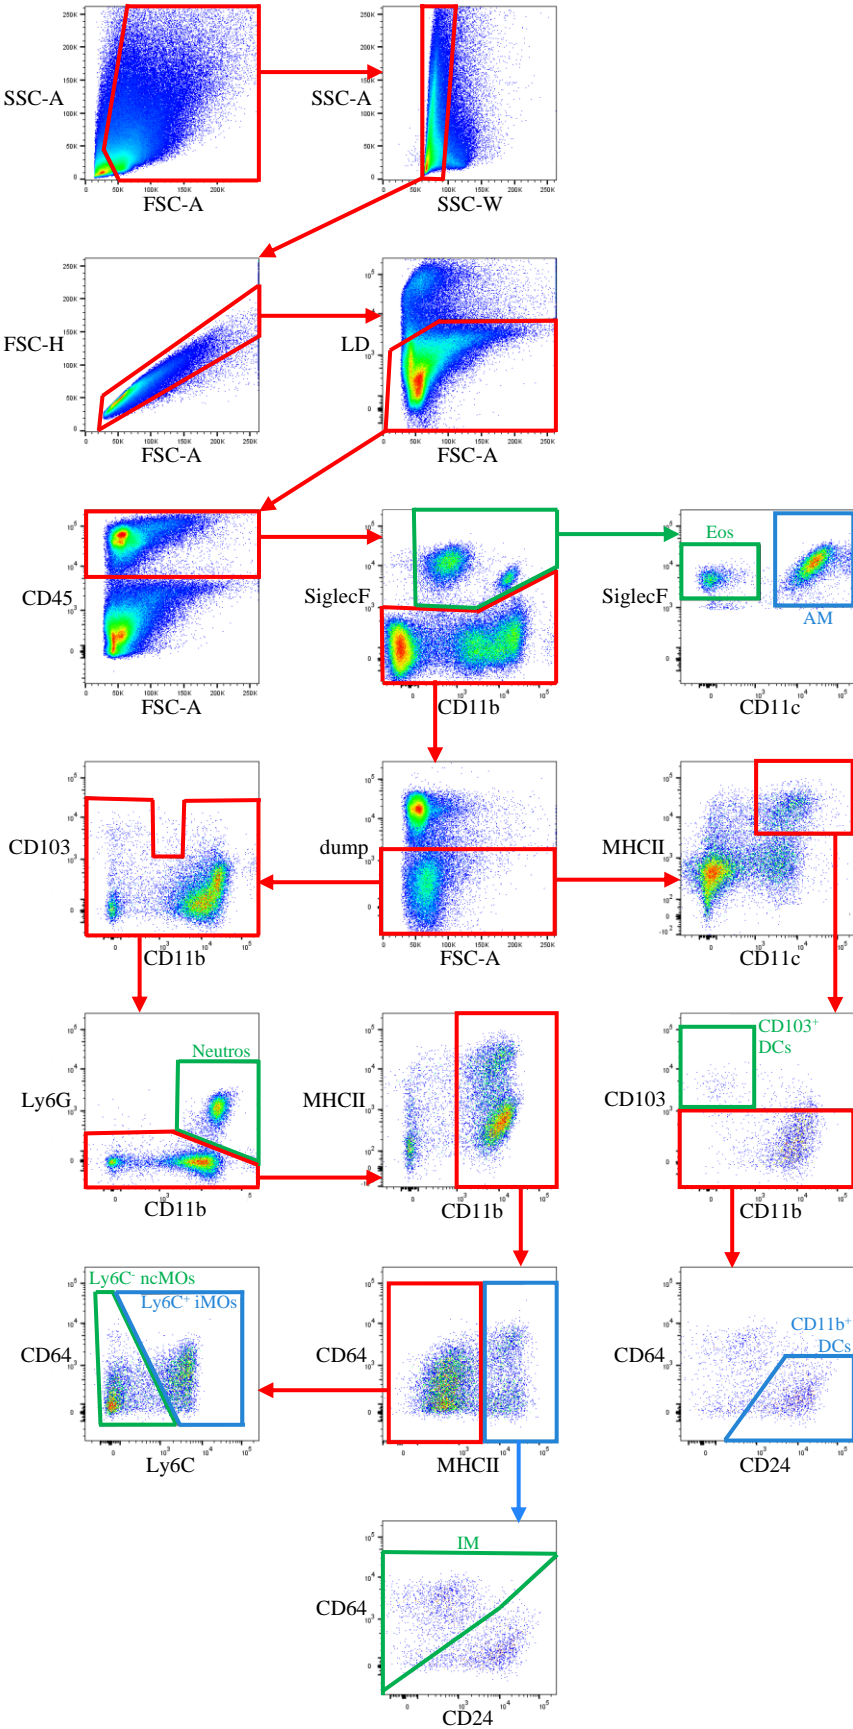

*PbNK65*

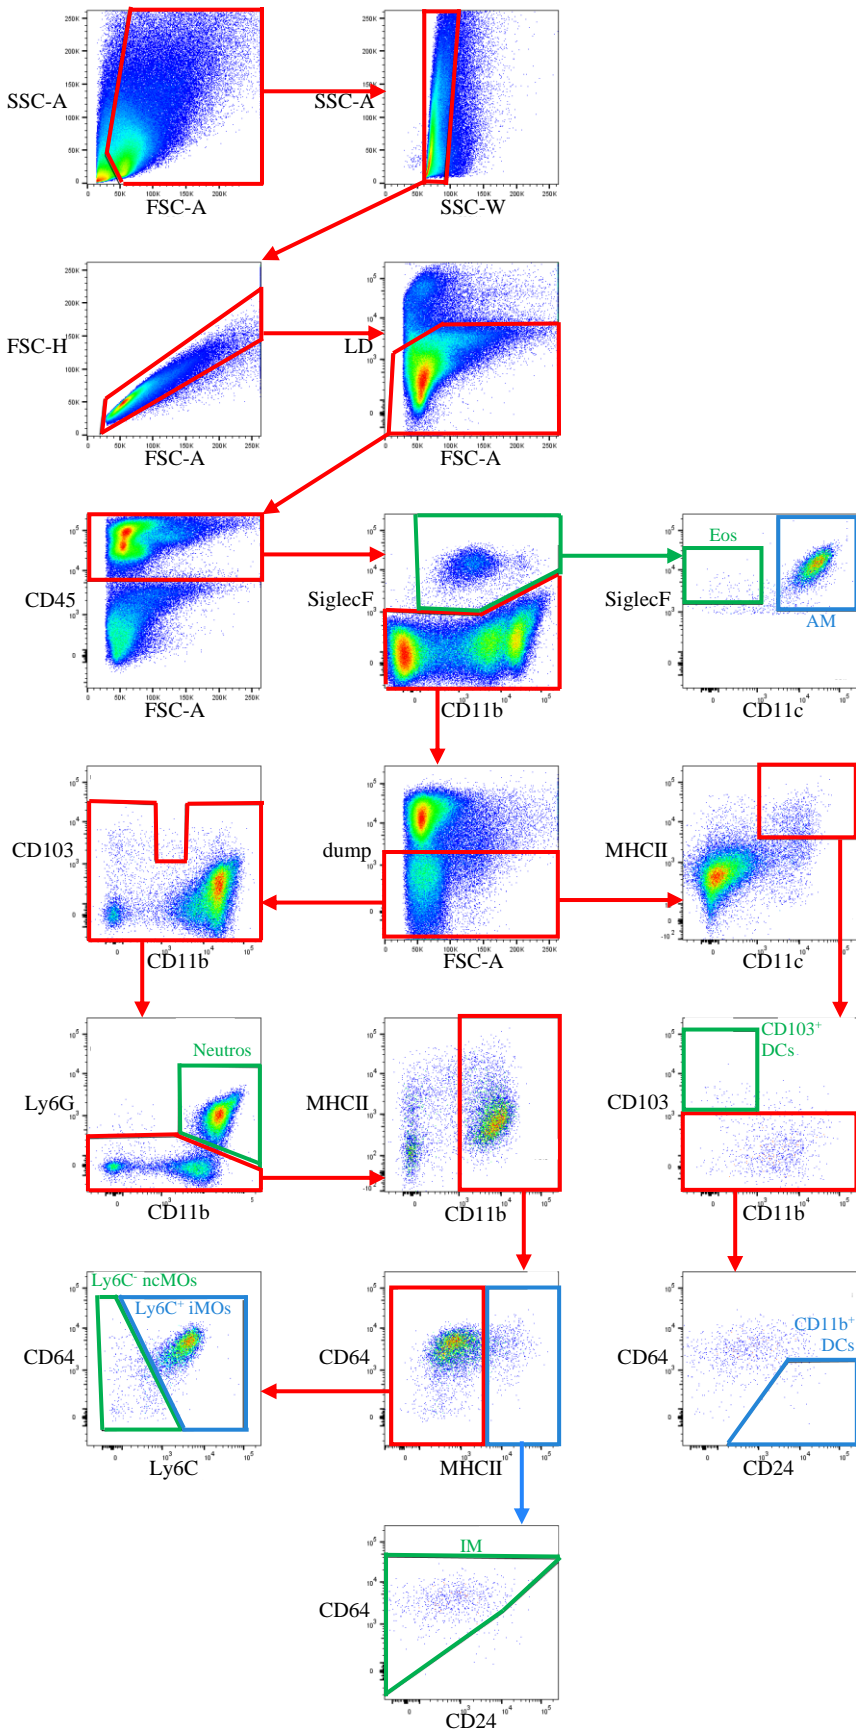

# Gating strategy for the myeloid panel for splenocytes

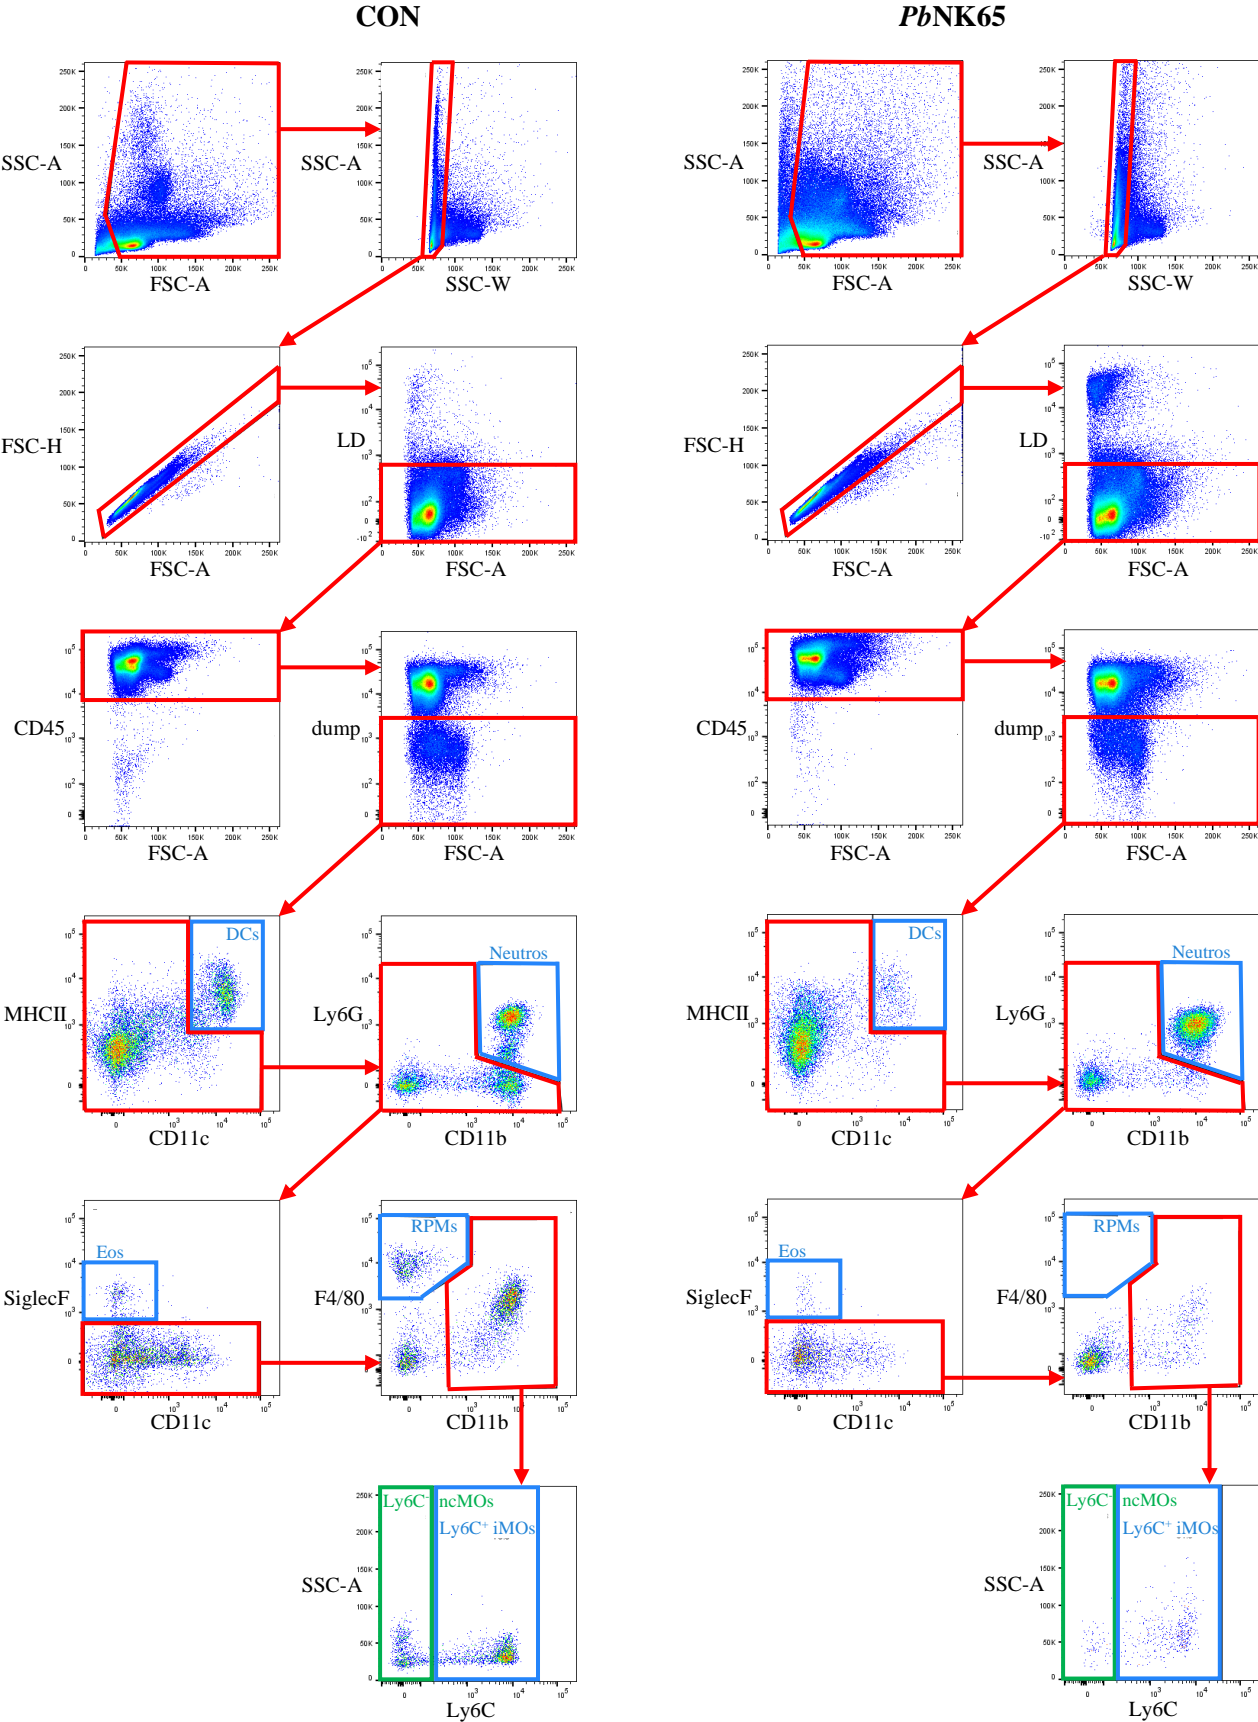

# Gating strategy for the CCR2 panel for pulmonary leukocytes

CON

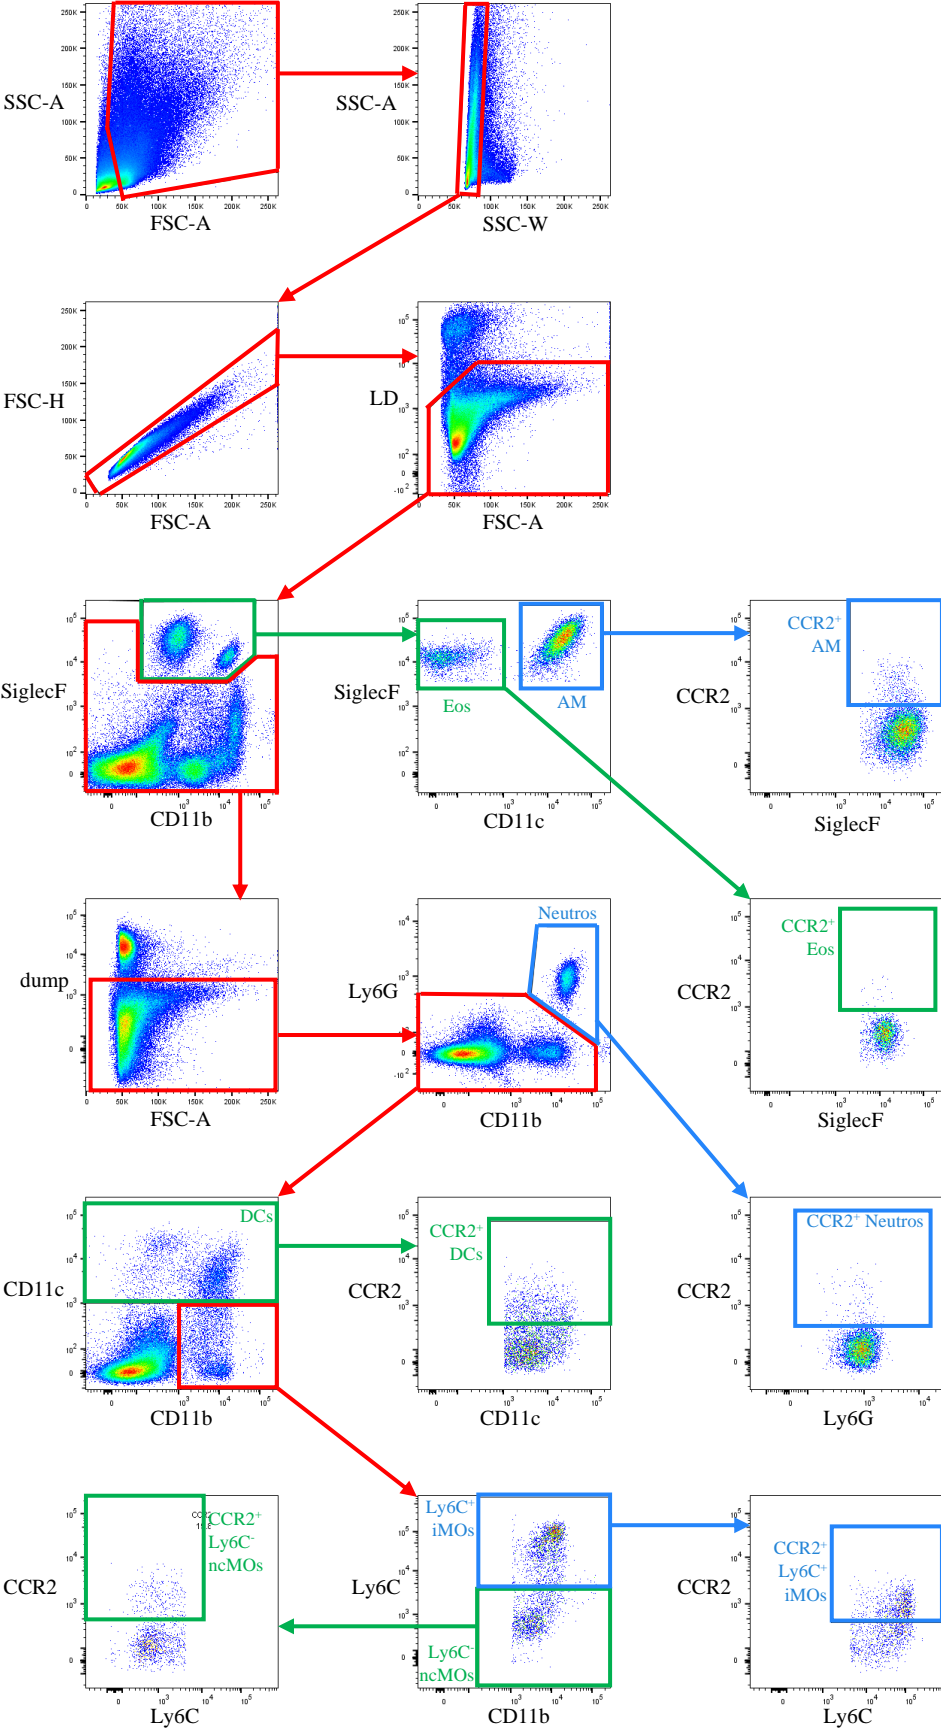

*PbNK65*

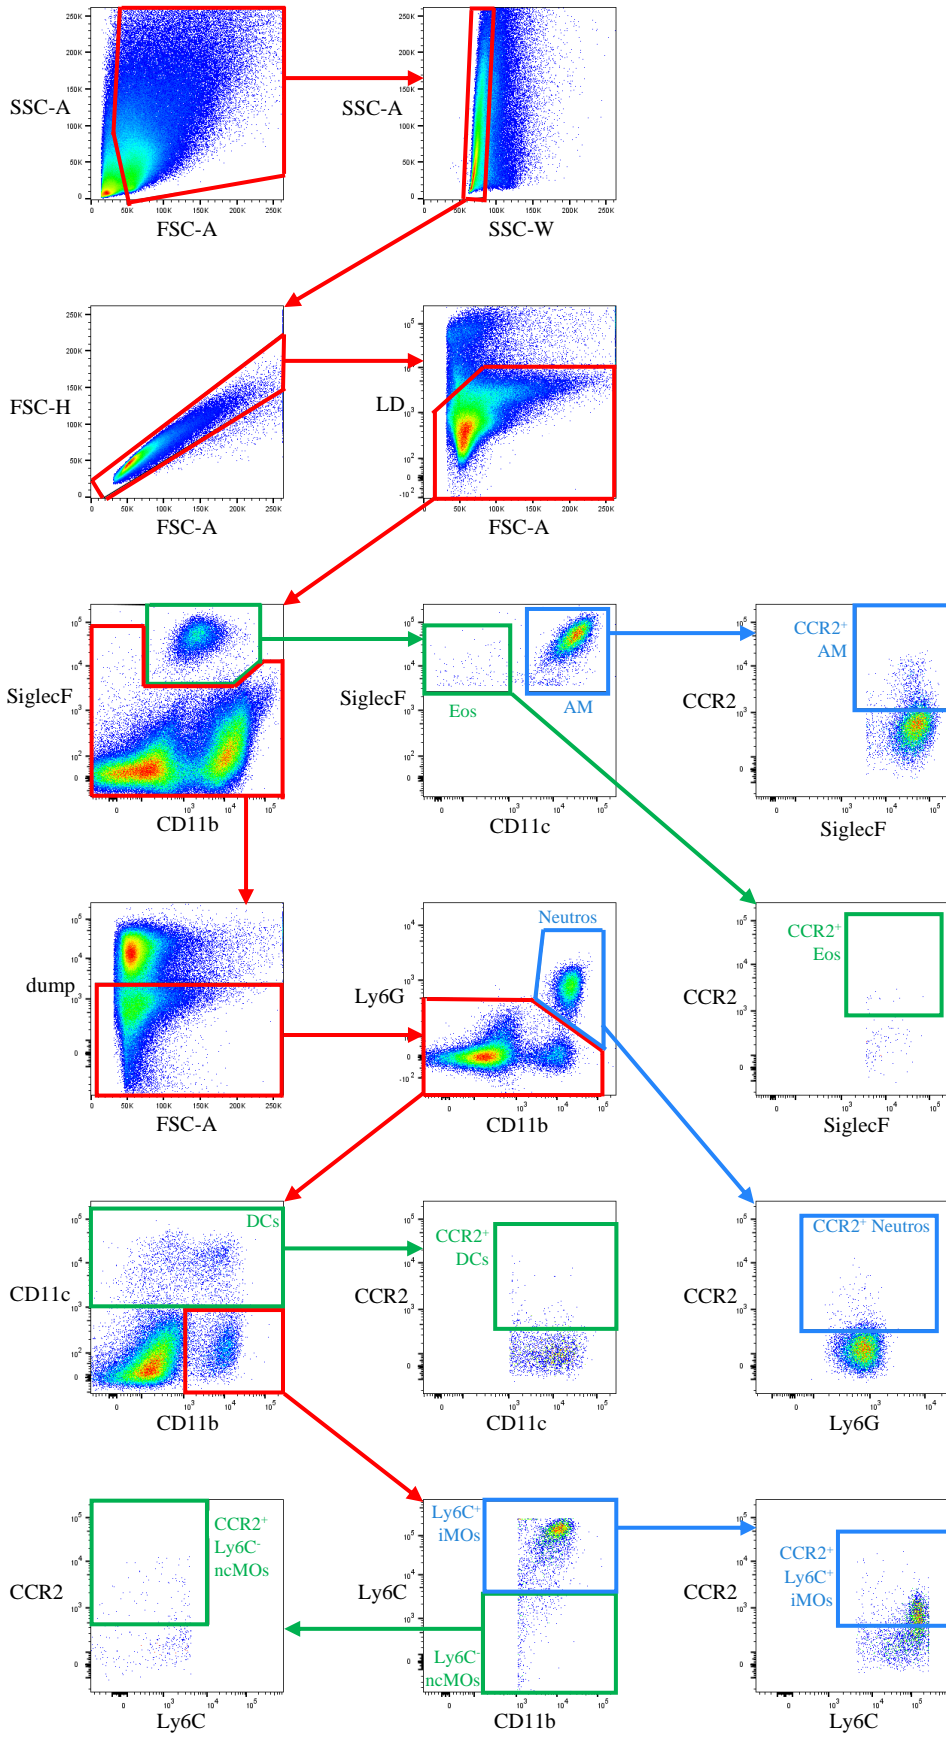



# Gating strategy for the CCR2 panel for splenocytes

CON

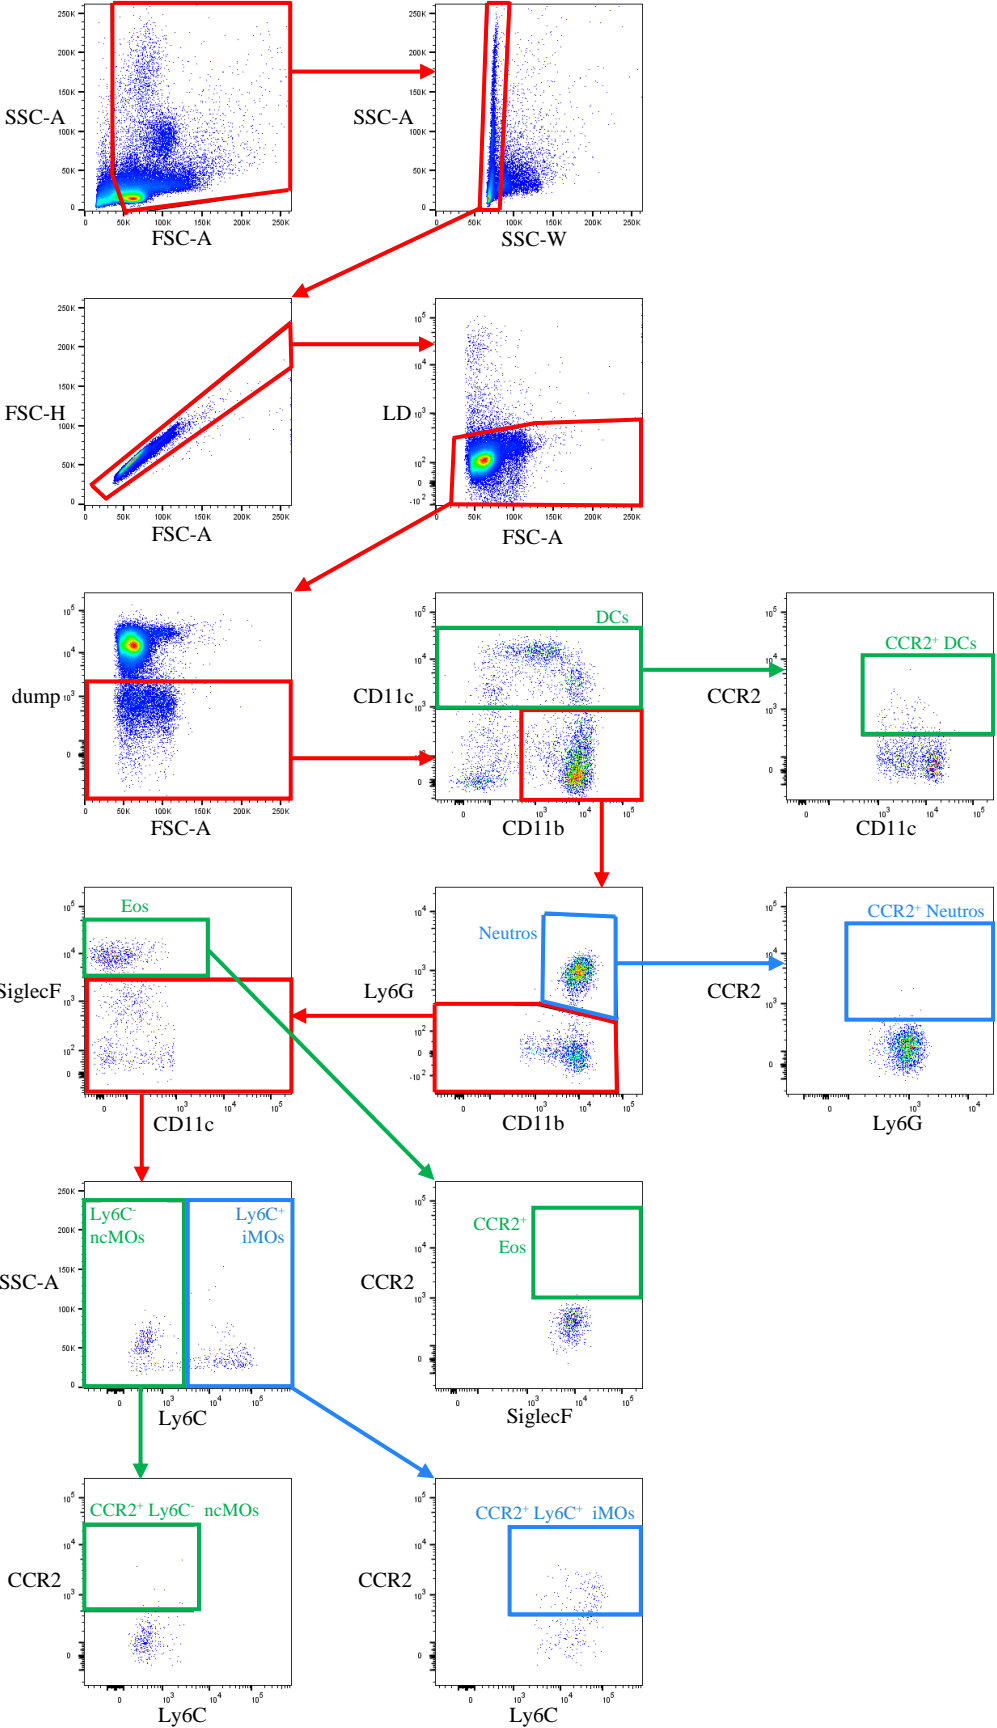

# *Pb*NK65

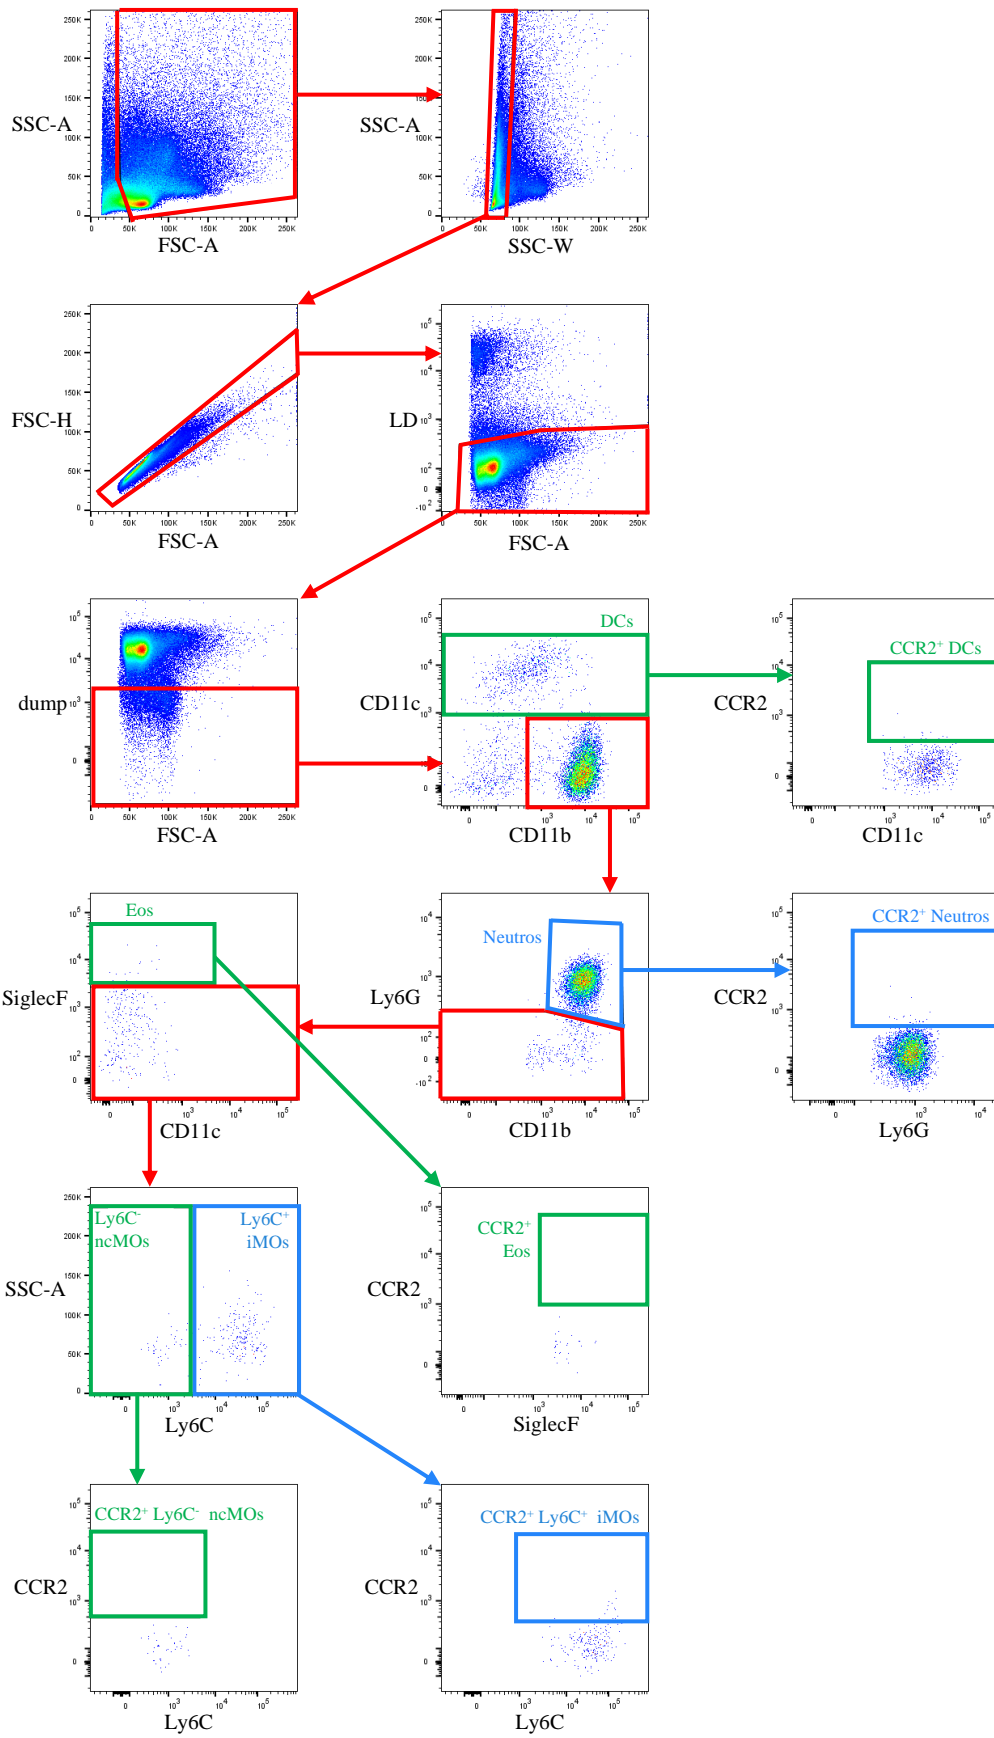

Supplement: DataSheet_1.pdf [file DataSheet_1.pdf]
