# Supplementary material for: CCR2 Is Dispensable for Disease Resolution but Required for the Restoration of Leukocyte Homeostasis Upon Experimental Malaria-Associated Acute Respiratory Distress Syndrome
Source: PubMed Central journal article supplement (PMC7921736; doi:10.3389/fimmu.2020.628643), 2021-02-16
Supplement: DataSheet_2.pdf [file DataSheet_2.pdf]

## Supplementary Figures

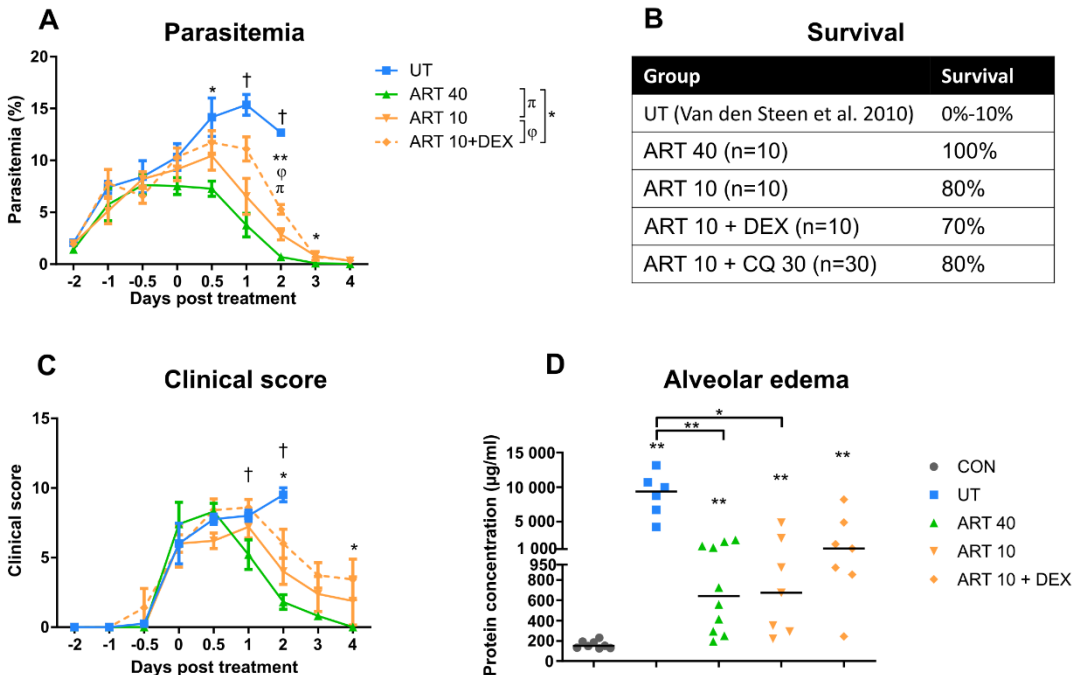

### Supplementary Figure 1. Comparison of different antimalarial treatments in *PbNK65*-infected C57BL/6 mice.

C57BL/6 mice were infected with *PbNK65*. Mice were injected daily for four days with 40 mg/kg ART, 10 mg/kg ART or 10 mg/kg ART + 3 mg/kg dexamethasone (DEX) starting when the first disease symptoms appeared. Mice in the untreated (UT) group were injected with carrier-solution (0.4% NaHCO<sub>3</sub> in 0.9% NaCl). (A) Parasitemia was determined daily using Giemsa-stained blood smears. Significant differences are indicated according to the symbol code presented in the legend. (B) Proportion of the mice that survived until 4 days p.t. was calculated. n=10 for ART 40, n=10 for ART 10, n=10 for ART 10 + DEX, n= 30 for ART 10 + CQ 30. UT was based on data of previous experiments (31) (C) The clinical score was monitored daily. (A,C) Compilation of two experiments. Data are means  $\pm$  SEM. n=2-8 for UT, n=5-10 for ART 40, n=5-10 for ART 10, n= 3-10 for ART 10 + DEX. (D) The protein concentration in the BALF was determined as a measure of alveolar edema at 1 day p.t. for the UT group and at 4 days p.t. for the ART 40, ART 10 and ART 10 + DEX groups. Compilation of two experiments. Each symbol represents data of an individual mouse. n = 8 for CON, n = 6 for UT, n=10 for ART 40, n=7 for ART 10, n=7 for ART 10 + DEX.

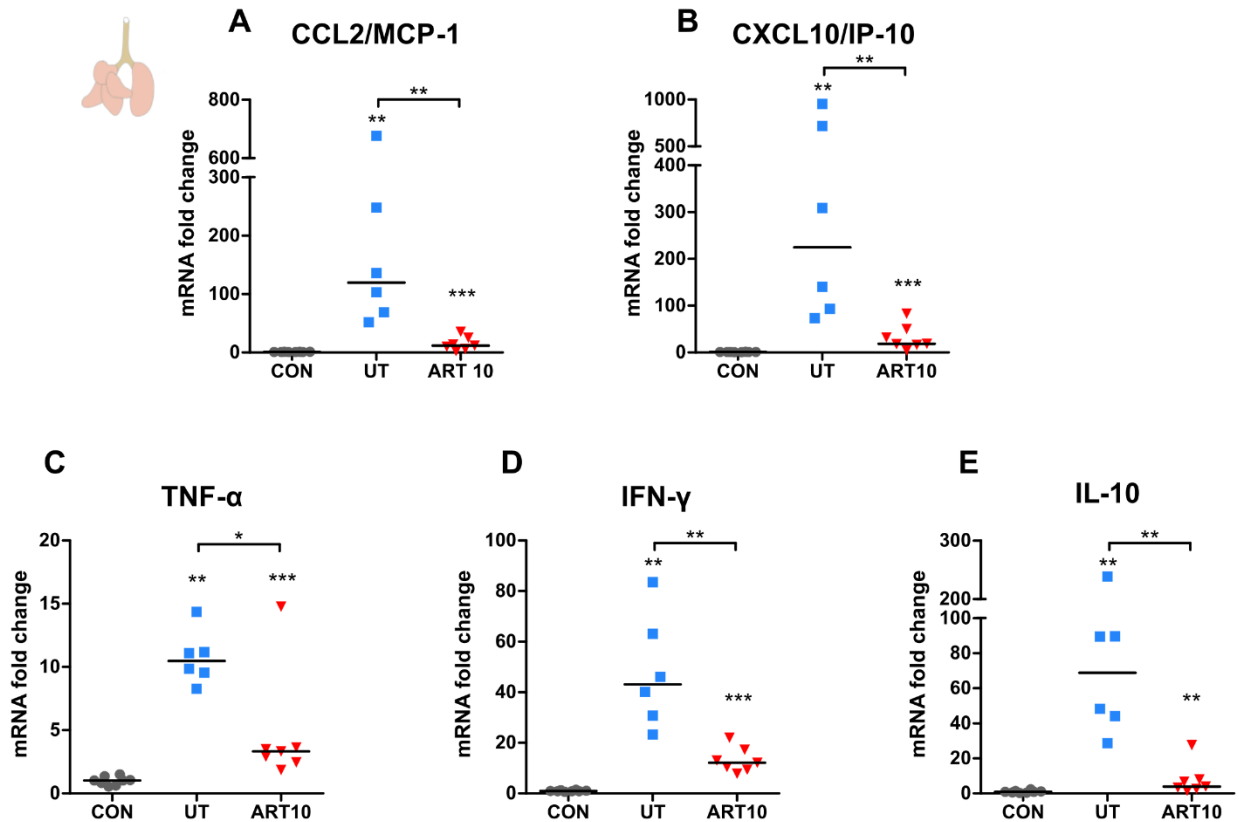

**Supplementary Figure 2. Antimalarial treatment reduces the expression of pro-inflammatory chemokines and cytokines.**

*C57BL/6* mice were infected with *PbNK65*. Mice were injected daily for four days with 10 mg/kg ART starting when the first disease symptoms appeared. Mice in the untreated (UT) group were injected with carrier-solution (0.4% NaHCO<sub>3</sub> in 0.9% NaCl). The difference in the mRNA fold expression in the left lungs on the day of dissection (1 day p.t. for UT group and 4 days p.t. for the ART 10 group) was determined for the indicated molecules. Compilation of two experiments. Each symbol represents data of an individual mouse. n = 8 for CON, n = 6 for UT and n = 7 for ART 10.

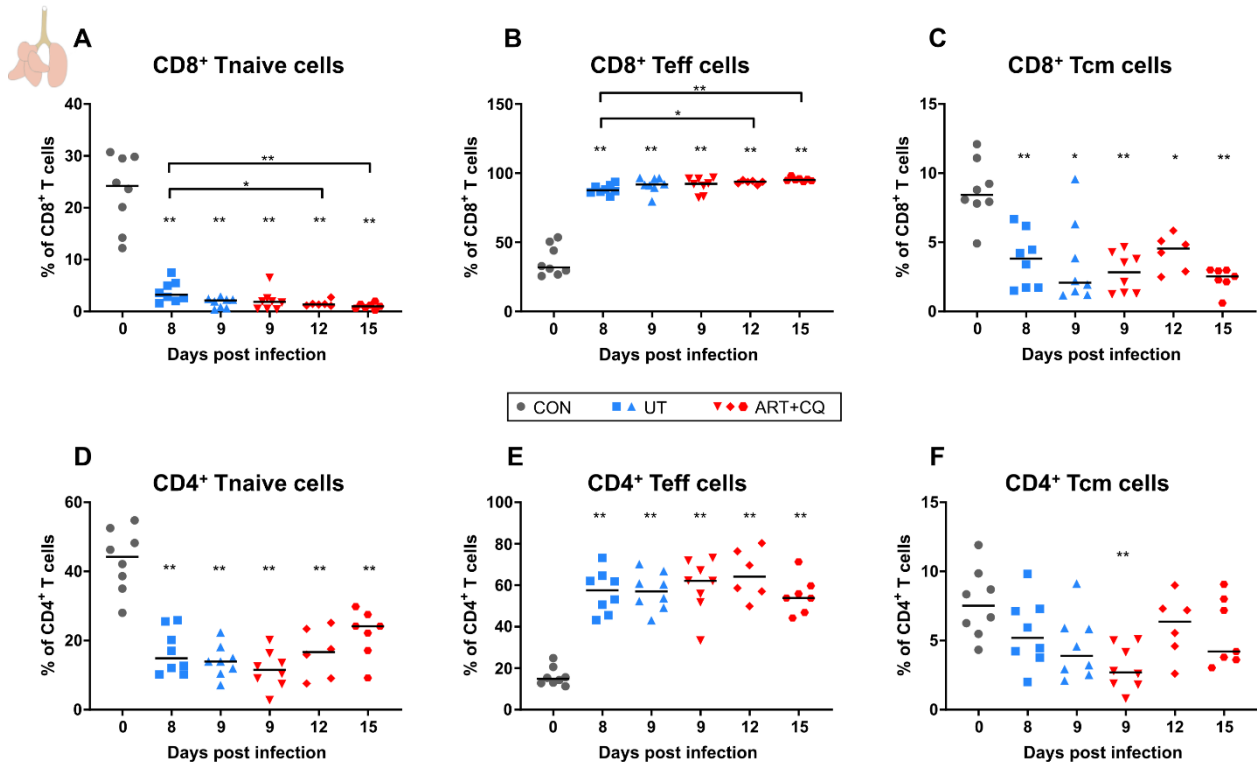

**Supplementary Figure 3. Activation status of CD4<sup>+</sup> and CD8<sup>+</sup> T cells in the lungs during resolution.**

C57BL/6 mice were infected with *PbNK65*. Mice were injected daily from 8 until 12 days p.i. with 10 mg/kg ART + 30 mg/kg CQ. Mice were dissected at the indicated days p.i. Leukocytes were isolated from the lungs according to protocol 1 and flow cytometry was performed. (A-C) The percentages of Tnaive (CD44<sup>-</sup> CD62L<sup>+</sup>), Teff (CD44<sup>+</sup> CD62L<sup>-</sup>) and Tcm (CD44<sup>+</sup> CD62L<sup>+</sup>) of the total CD8<sup>+</sup> T cell population are shown. (D-F) The percentages of Tnaive (CD44<sup>-</sup> CD62L<sup>+</sup>), Teff (CD44<sup>+</sup> CD62L<sup>-</sup>) and Tcm (CD44<sup>+</sup> CD62L<sup>+</sup>) of the total CD8<sup>+</sup> T cell population are shown. Compilation of two experiments. Each symbol represents data of an individual mouse. n=8 for CON on day 0, UT at 8 and 9 days p.i. and ART+CQ at 9 days p.i., n=6 for ART+CQ at 12 days p.i., n=7 for ART+CQ at 15 days p.i.

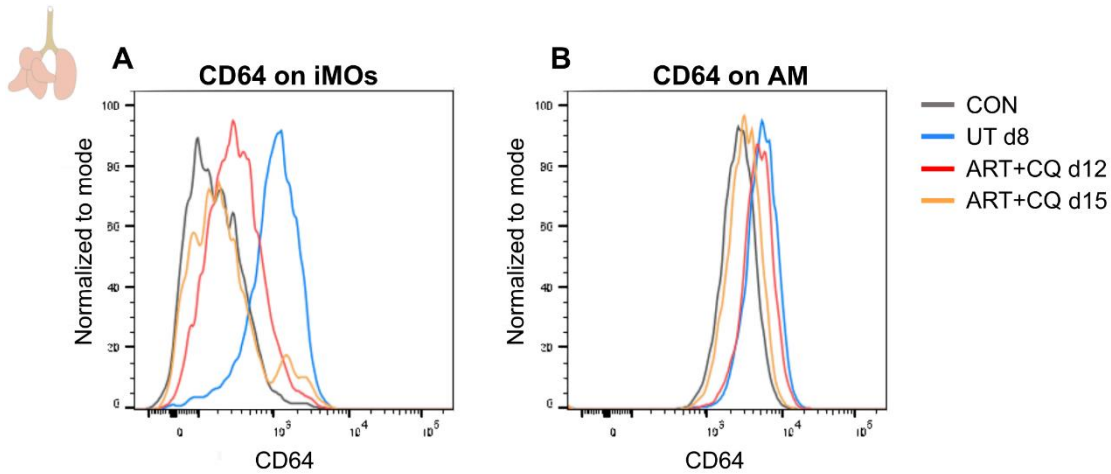

**Supplementary Figure 4. Dynamics of CD64 expression by iMOs and AM during resolution.**

C57BL/6 mice were infected with *PbNK65*. Mice were injected daily from 8 until 12 days p.i. with 10 mg/kg ART + 30 mg/kg CQ. Mice were dissected at the indicated days p.i. Leukocytes were isolated from the lungs according to protocol 1 and flow cytometry was performed. Representative histograms of the expression of CD64 on inflammatory monocytes (iMOs, (A); CD45<sup>+</sup> Lin<sup>-</sup> CD11b<sup>hi</sup> MHC-II<sup>-</sup> Ly6C<sup>+</sup>) and alveolar macrophages (AM, (B); CD45<sup>+</sup> SiglecF<sup>+</sup> CD11b<sup>int</sup> CD11c<sup>+</sup>) are shown.

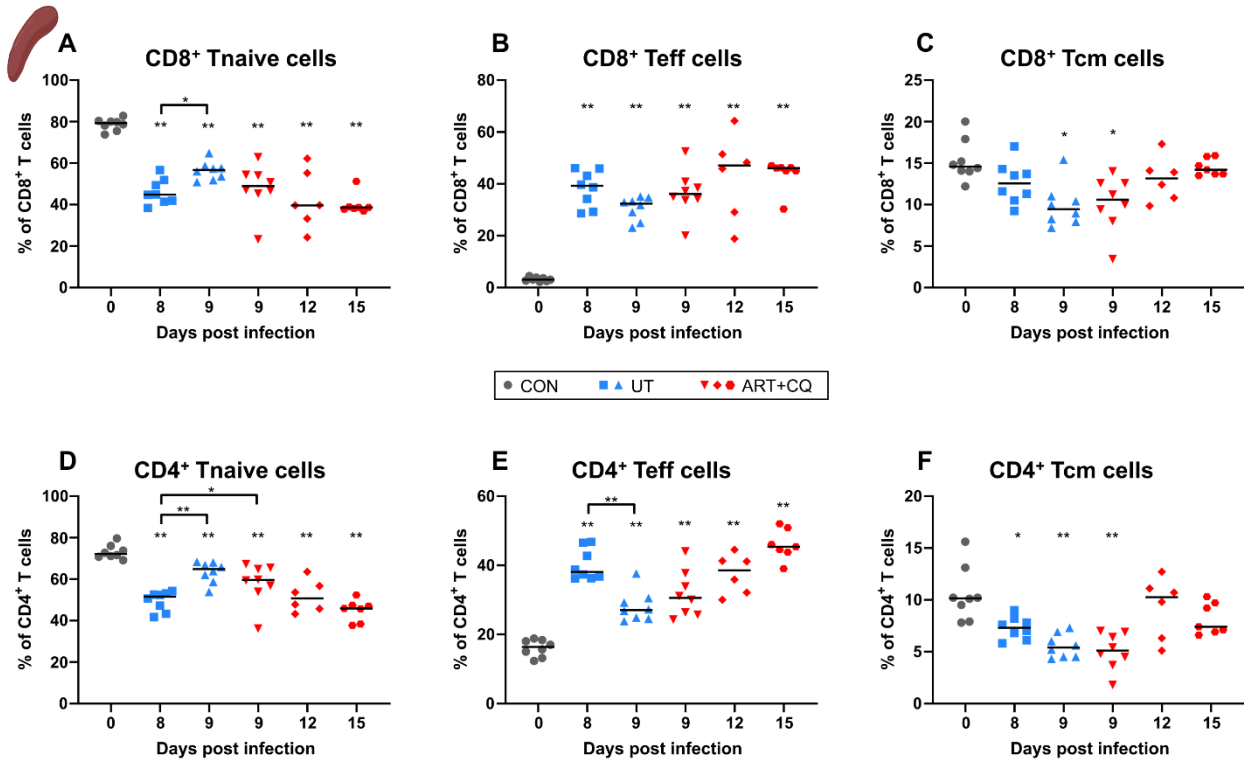

**Supplementary Figure 5. Activation status of CD4<sup>+</sup> and CD8<sup>+</sup> T cells in the spleen during resolution.**

C57BL/6 mice were infected with *PbNK65*. Mice were injected daily from 8 until 12 days p.i. with 10 mg/kg ART + 30 mg/kg CQ. Mice were dissected at the indicated days p.i. Leukocytes were isolated from the spleen and flow cytometry was performed. (A-C) The percentages of Tnaive (CD44<sup>-</sup> CD62L<sup>+</sup>), Teff (CD44<sup>+</sup> CD62L<sup>-</sup>) and Tcm (CD44<sup>+</sup> CD62L<sup>+</sup>) of the total CD8<sup>+</sup> T cell population are shown. (D-F) The percentages of Tnaive (CD44<sup>-</sup> CD62L<sup>+</sup>), Teff (CD44<sup>+</sup> CD62L<sup>-</sup>) and Tcm (CD44<sup>+</sup> CD62L<sup>+</sup>) of the total CD4<sup>+</sup> T cell population are shown. Compilation of two experiments. Each symbol represents data of an individual mouse. n=8 for CON on day 0, UT at 8 and 9 days p.i and ART+CQ at 9 days p.i., n=6 for ART+CQ at 12 days p.i., n=7 for ART+CQ at 15 days p.i.

## Confirmation of the CCR2 KO

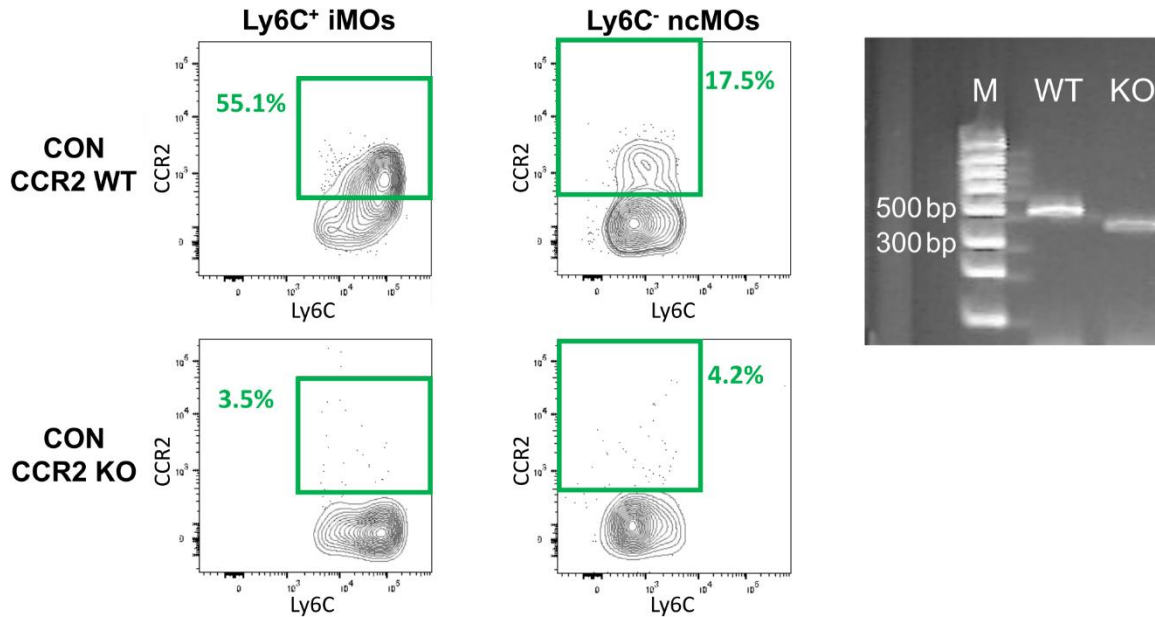**Supplementary Figure 6. Confirmation of the CCR2 knock-out.**

Leukocytes were isolated from the lungs according to protocol 2 and flow cytometry was performed. Representative flow cytometry plots showing the CCR2 expression of Ly6C<sup>+</sup> iMOs (CD45<sup>+</sup> Lin<sup>-</sup> CD11b<sup>hi</sup> MHC-II<sup>-</sup> Ly6C<sup>+</sup>) and Ly6C<sup>-</sup> ncMOs (CD45<sup>+</sup> Lin<sup>-</sup> CD11b<sup>hi</sup> MHC-II<sup>-</sup> Ly6C<sup>-</sup>) in the lungs of both uninfected CCR2 WT and KO mice. Confirmation of the CCR2 KO on DNA level using PCR and gel electrophoresis (WT band: 494 bp, KO band: ~390 bp).

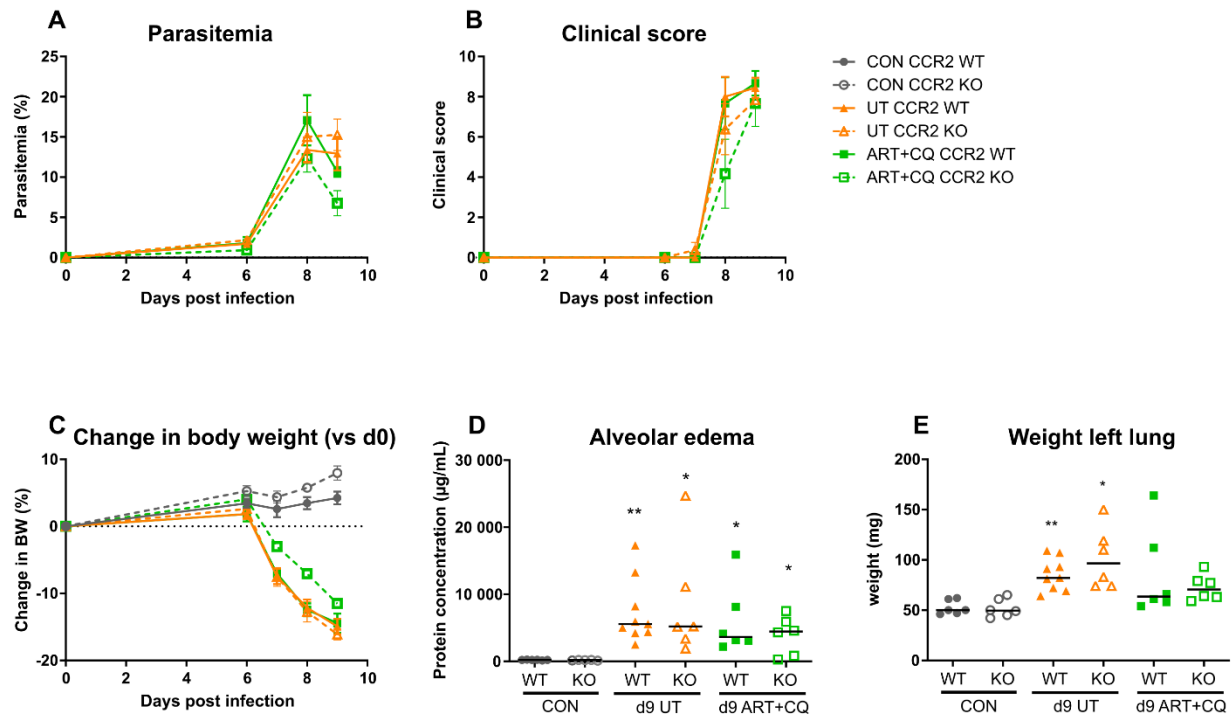

**Supplementary Figure 7. CCR2 gene knock-out has no effect on the development nor the resolution of MA-ARDS at 9 days p.i.**

CCR2 WT and CCR2 KO C57BL/6 mice were infected with *PbNK65*. Mice were injected at 8 days p.i. with 10 mg/kg ART + 30 mg/kg CQ. (A) Parasitemia was determined daily using Giemsa-stained blood smears. (B) The clinical score was monitored daily starting at 6 days p.i. (C) The change in body weight was calculated compared to day 0 p.i. starting at 6 days p.i. (A-C) Compilation of two experiments, except ART+ CQ CCR2 WT and KO group only one experiment. Data are means  $\pm$  SEM. n=6 for CON CCR2 WT, n=6 for CON CCR2 KO, n=9-10 for UT CCR2 WT, n=6-8 for UT CCR2 KO, n=6 for ART+CQ CCR2 WT, n=6 for ART+CQ CCR2 KO. (D-E) Lung pathology was quantified based on the protein concentration in the BALF (D) and the weight of the left lung (E) at 9 days p.i. for the UT group and the ART+CQ group. Compilation of two experiments, except ART+ CQ CCR2 WT and KO group only one experiment. Each symbol represents data of an individual mouse. n=6 for CON CCR2 WT, n=5 for CON CCR2 KO, n=9 for UT CCR2 WT, n=6 for UT CCR2 KO, n=6 for ART+CQ CCR2 WT, n=6 for ART+CQ CCR2 KO.

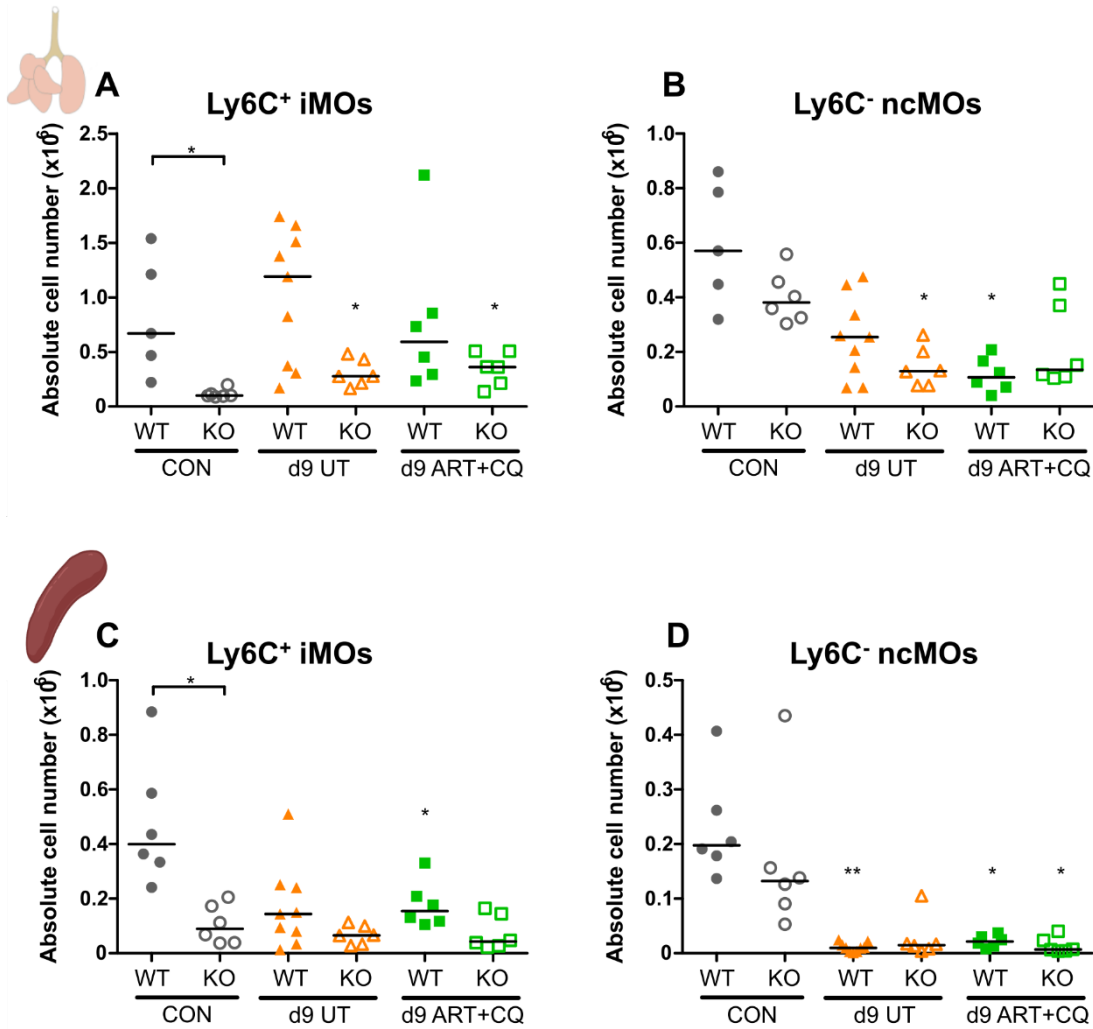

**Supplementary Figure 8. CCR2 gene knock-out induced a decreased trend in pulmonary inflammatory monocytes at 9 days p.i.**

CCR2 WT and CCR2 KO C57BL/6 mice were infected with *PbNK65*. Mice were injected daily from 8 until 12 days p.i. with 10 mg/kg ART + 30 mg/kg CQ. Mice were dissected at the indicated days p.i. Leukocytes were isolated from the lungs according to protocol 2 and from the spleen and flow cytometry was performed. (A-D) The absolute numbers of Ly6C<sup>+</sup> iMOs (A,C) and Ly6C<sup>-</sup> ncMOs (B,D) present in the lungs (A,B) and spleen (C,D) were calculated. Compilation of two experiments, except ART+ CQ CCR2 WT and KO group only one experiment. Each symbol represents data of an individual mouse. n=5 for CON CCR2 WT, n=6 for CON CCR2 KO, n=9 for UT CCR2 WT, n=6 for UT CCR2 KO, n=6 for ART+CQ CCR2 WT, n=6 for ART+CQ CCR2 KO.



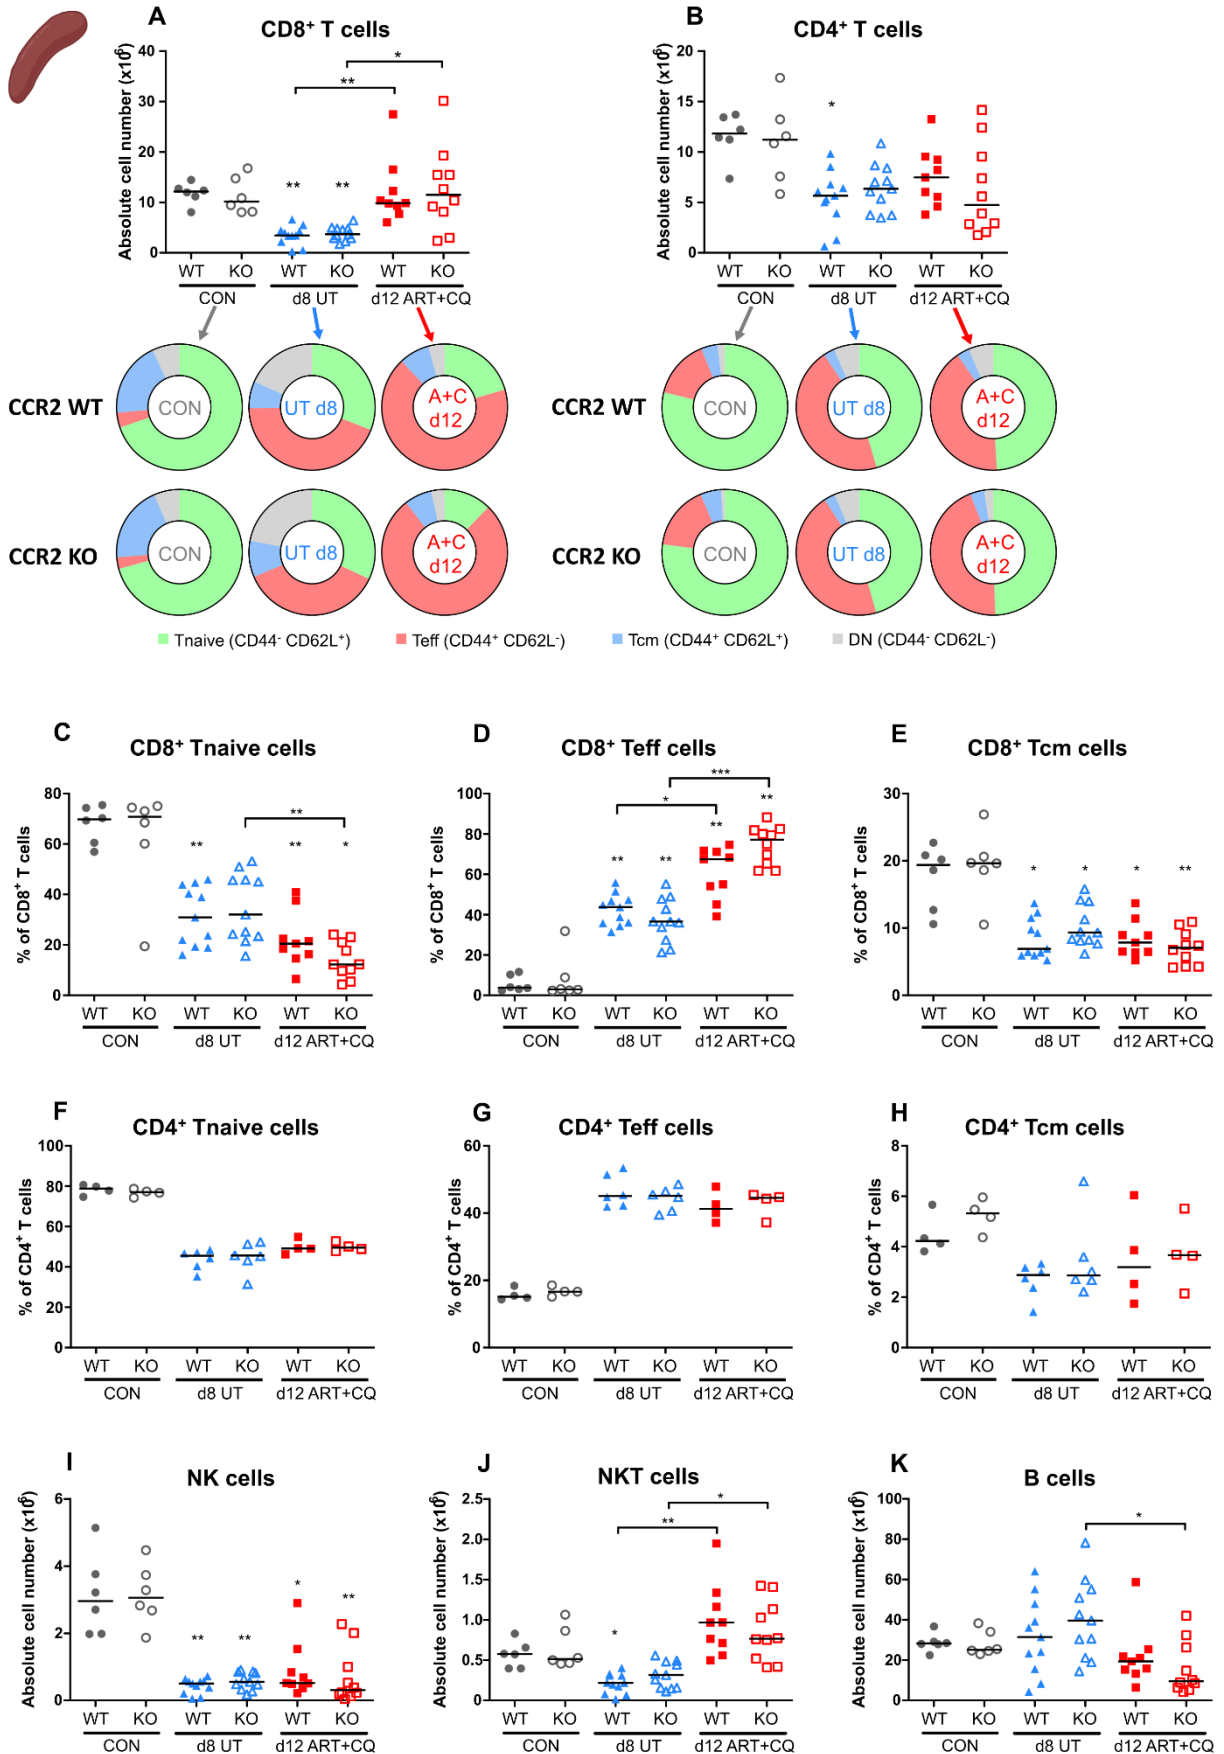

**Supplementary Figure 9. No effect of CCR2 gene knock-out was observed on the number of splenic lymphocytes.**

CCR2 WT and CCR2 KO C57BL/6 mice were infected with *PbNK65*. Mice were injected daily from 8 until 12 days p.i. with 10 mg/kg ART + 30 mg/kg CQ. Mice were dissected at the indicated days p.i. Leukocytes were isolated from the spleen and flow cytometry was performed. (A-H) The absolute numbers of CD8<sup>+</sup> T cells (CD45<sup>+</sup> CD3<sup>+</sup> NK1.1<sup>-</sup> CD8<sup>+</sup>) and CD4<sup>+</sup> T cells (CD45<sup>+</sup> CD3<sup>+</sup> NK1.1<sup>-</sup> CD4<sup>+</sup>) and the percentages of Tnaive (CD44<sup>-</sup> CD62L<sup>+</sup>), Teff (CD44<sup>+</sup> CD62L<sup>-</sup>) and Tcm (CD44<sup>+</sup> CD62L<sup>+</sup>) of the total cell population are shown. (I-K) The absolute numbers of NK cells (CD45<sup>+</sup> CD3<sup>-</sup> NK1.1<sup>+</sup>), NKT cells (CD45<sup>+</sup> CD3<sup>+</sup> NK1.1<sup>+</sup>) and B cells (CD45<sup>+</sup> CD3<sup>-</sup> NK1.1<sup>-</sup> B220<sup>+</sup>) were calculated. Compilation of two experiments, except activation of CD4<sup>+</sup> T cells (F-H) only one experiment. Each symbol represents data of an individual mouse. n=4-6 for CON CCR2 WT, n=4-6 for CON CCR2 KO, n=6-11 for UT CCR2 WT, n=6-11 for UT CCR2 KO, n=4-9 for ART+CQ CCR2 WT, n=4-10 for ART+CQ CCR2 KO.

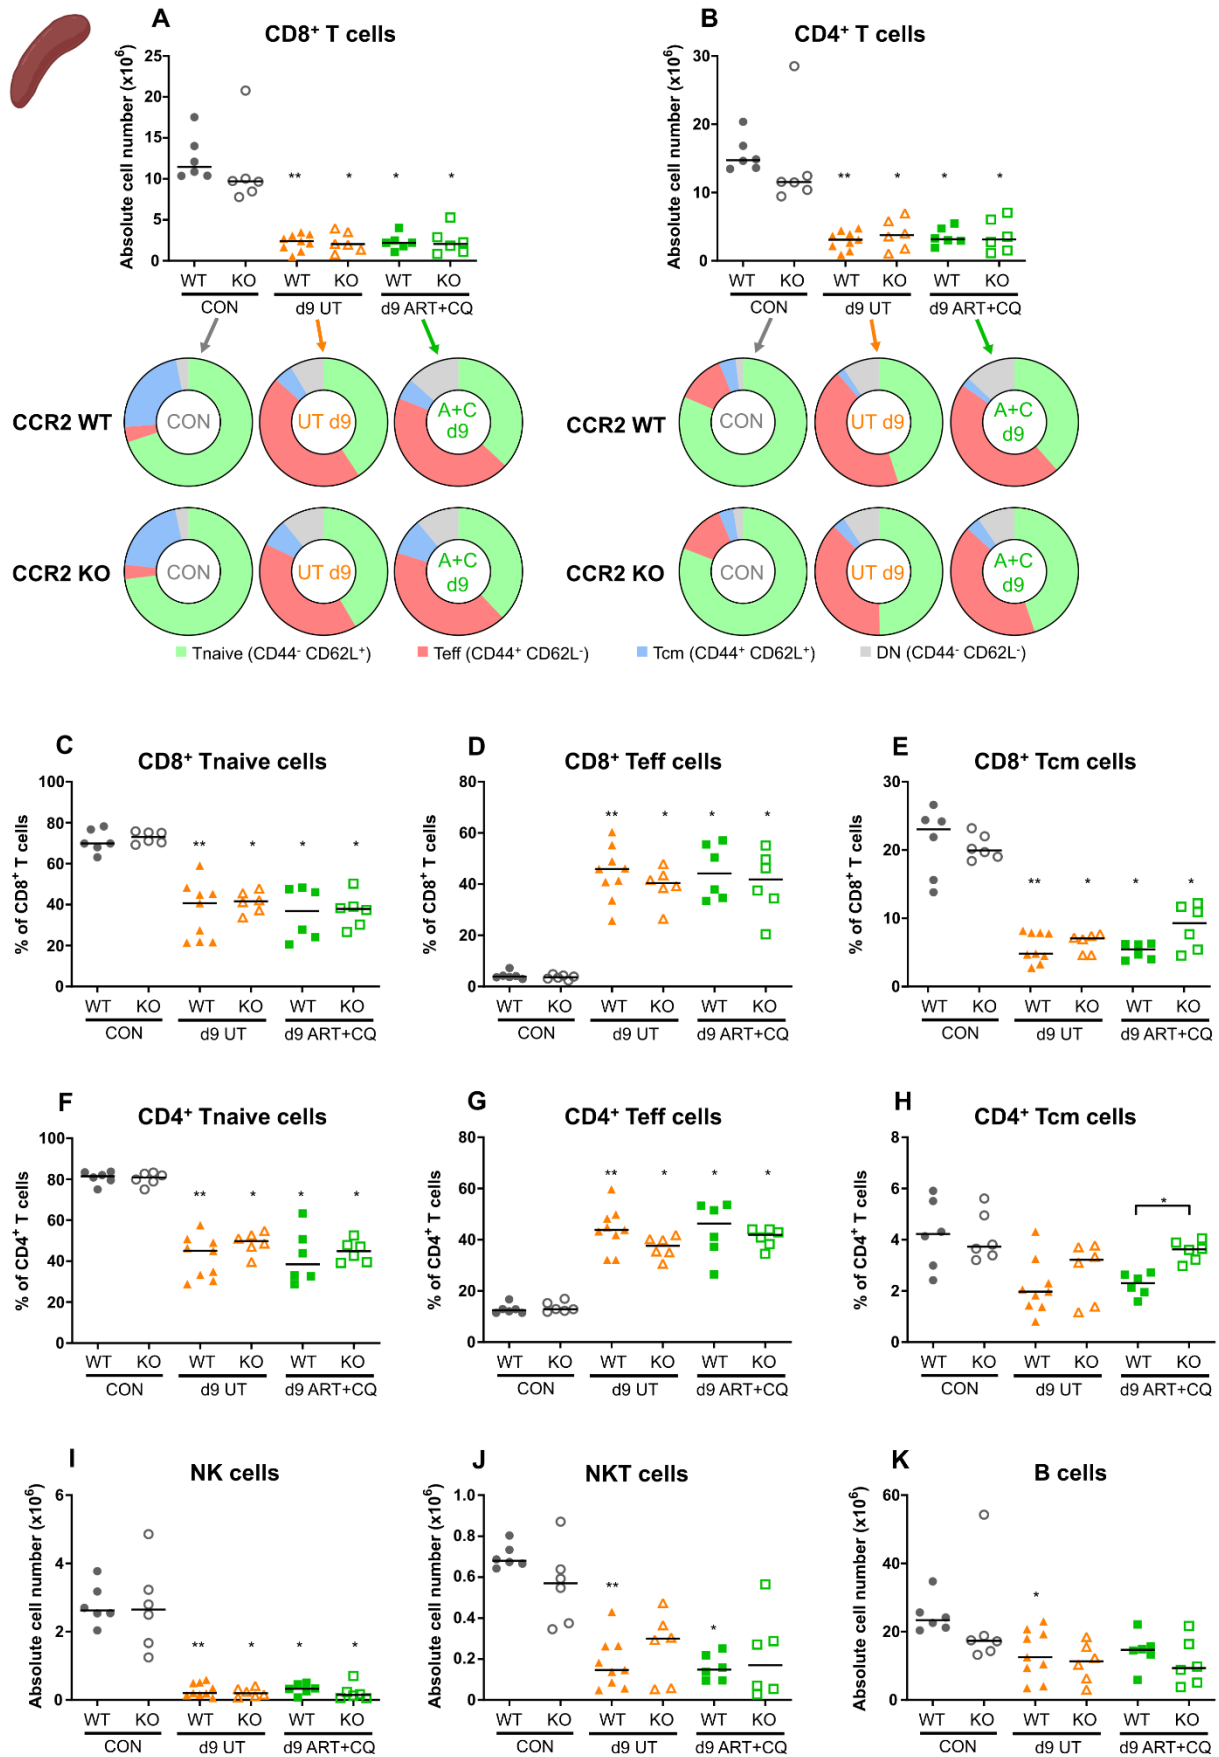

**Supplementary Figure 10. No effect of CCR2 gene knock-out was observed on the number of splenic lymphocytes at 9 days p.i.**

CCR2 WT and CCR2 KO C57BL/6 mice were infected with *PbNK65*. Mice were injected at 8 days p.i. with 10 mg/kg ART + 30 mg/kg CQ. Mice were dissected at the indicated days p.i. Leukocytes were isolated from the spleen and flow cytometry was performed. (A-H) The absolute numbers of CD8<sup>+</sup> T cells (CD45<sup>+</sup> CD3<sup>+</sup> NK1.1<sup>-</sup> CD8<sup>+</sup>) and CD4<sup>+</sup> T cells (CD45<sup>+</sup> CD3<sup>+</sup> NK1.1<sup>-</sup> CD4<sup>+</sup>) and the percentages of Tnaive (CD44<sup>-</sup> CD62L<sup>+</sup>), Teff (CD44<sup>+</sup> CD62L<sup>-</sup>) and Tcm (CD44<sup>+</sup> CD62L<sup>+</sup>) of the total cell population are shown. (I-K) The absolute numbers of NK cells (CD45<sup>+</sup> CD3<sup>-</sup> NK1.1<sup>+</sup>), NKT cells (CD45<sup>+</sup> CD3<sup>+</sup> NK1.1<sup>+</sup>) and B cells (CD45<sup>+</sup> CD3<sup>-</sup> NK1.1<sup>-</sup> B220<sup>+</sup>) were calculated. Compilation of two experiments, except ART+ CQ CCR2 WT and KO group only one experiment. Each symbol represents data of an individual mouse. n=6 for CON CCR2 WT, n=6 for CON CCR2 KO, n=9 for UT CCR2 WT, n=6 for UT CCR2 KO, n=6 for ART+CQ CCR2 WT, n=6 for ART+CQ CCR2 KO.

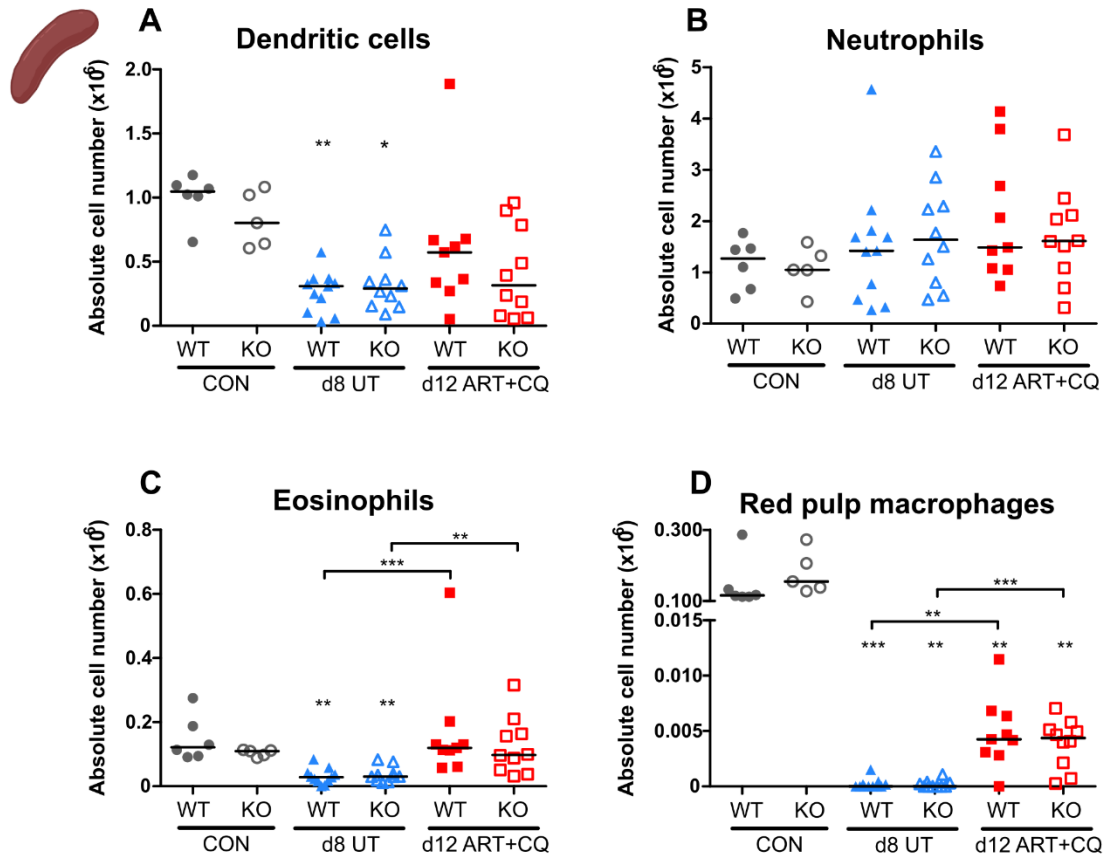

**Supplementary Figure 11. CCR2 gene knock-out had no effect on the myeloid cell populations in the spleen.**

CCR2 WT and CCR2 KO C57BL/6 mice were infected with *PbNK65*. Mice were injected daily from 8 until 12 days p.i. with 10 mg/kg ART + 30 mg/kg CQ. Mice were dissected at the indicated days p.i. Leukocytes were isolated from the spleen and flow cytometry was performed. (A-D) The absolute numbers of dendritic cells (CD45<sup>+</sup> Lin<sup>-</sup> MHC-II<sup>+</sup> CD11c<sup>+</sup>), neutrophils (CD45<sup>+</sup> Lin<sup>-</sup> CD11b<sup>+</sup> Ly6G<sup>+</sup>), eosinophils (CD45<sup>+</sup> Lin<sup>-</sup> CD11b<sup>+</sup> Ly6G<sup>-</sup> SiglecF<sup>+</sup>) and red pulp macrophages (CD45<sup>+</sup> Lin<sup>-</sup> MHC-II<sup>-</sup> CD11c<sup>-</sup> CD11b<sup>-</sup> F4/80<sup>+</sup>) present in the spleen were calculated. Compilation of two experiments. Each symbol represents data of an individual mouse. n=6 for CON CCR2 WT, n=5 for CON CCR2 KO, n=11 for UT CCR2 WT, n=10 for UT CCR2 KO, n=9 for ART+CQ CCR2 WT, n=10 for ART+CQ CCR2 KO.

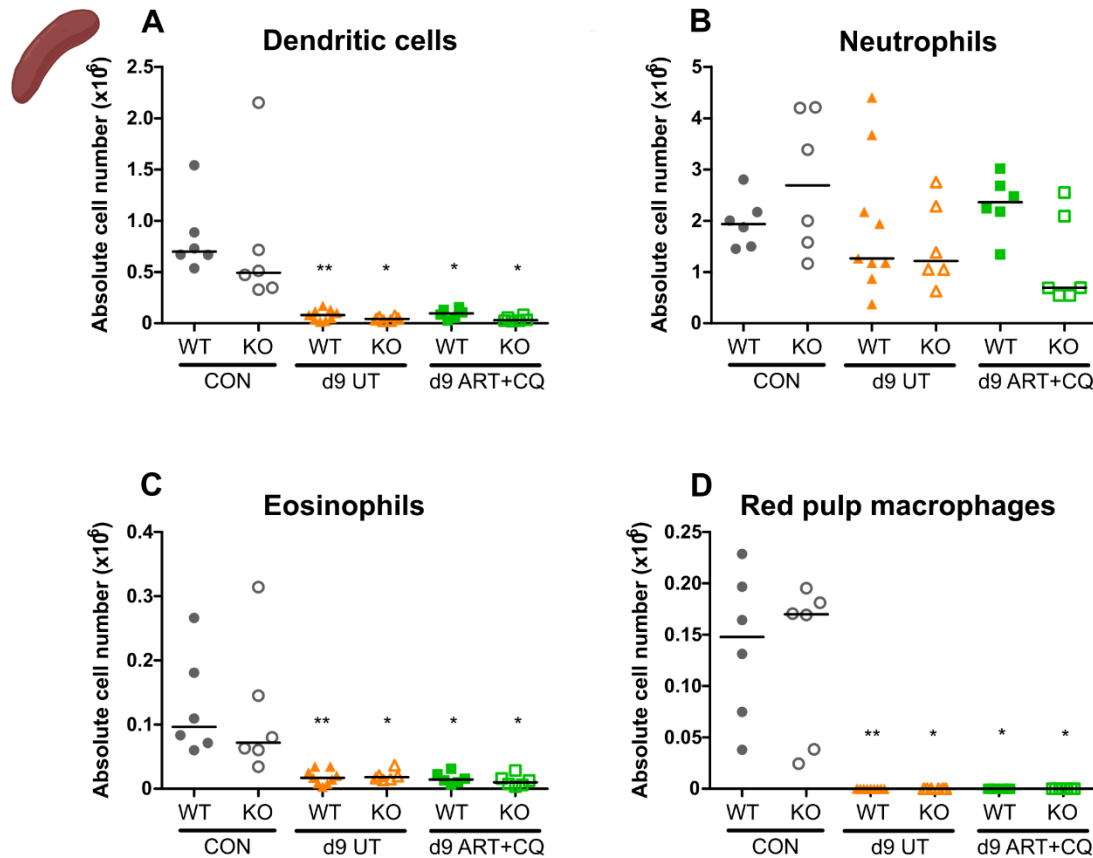

**Supplementary Figure 12. CCR2 gene knock-out had no effect on the number of myeloid cells present at 9 days p.i. in the spleen.**

CCR2 WT and CCR2 KO C57BL/6 mice were infected with *PbNK65*. Mice were injected at 8 days p.i. with 10 mg/kg ART + 30 mg/kg CQ. Mice were dissected at the indicated days p.i. Leukocytes were isolated from the spleen and flow cytometry was performed. (A-D) The absolute numbers of dendritic cells (CD45<sup>+</sup> Lin<sup>-</sup> MHC-II<sup>+</sup> CD11c<sup>+</sup>), neutrophils (CD45<sup>+</sup> Lin<sup>-</sup> CD11b<sup>+</sup> Ly6G<sup>+</sup>), eosinophils (CD45<sup>+</sup> Lin<sup>-</sup> CD11b<sup>+</sup> Ly6G<sup>-</sup> SiglecF<sup>+</sup>) and red pulp macrophages (CD45<sup>+</sup> Lin<sup>-</sup> MHC-II<sup>-</sup> CD11c<sup>-</sup> CD11b<sup>-</sup> F4/80<sup>+</sup>) present in the spleen were calculated. Compilation of two experiments, except ART+CQ CCR2 WT and KO group only one experiment. Each symbol represents data of an individual mouse. n=6 for CON CCR2 WT, n=6 for CON CCR2 KO, n=9 for UT CCR2 WT, n=6 for UT CCR2 KO, n=6 for ART+CQ CCR2 WT, n=6 for ART+CQ CCR2 KO.

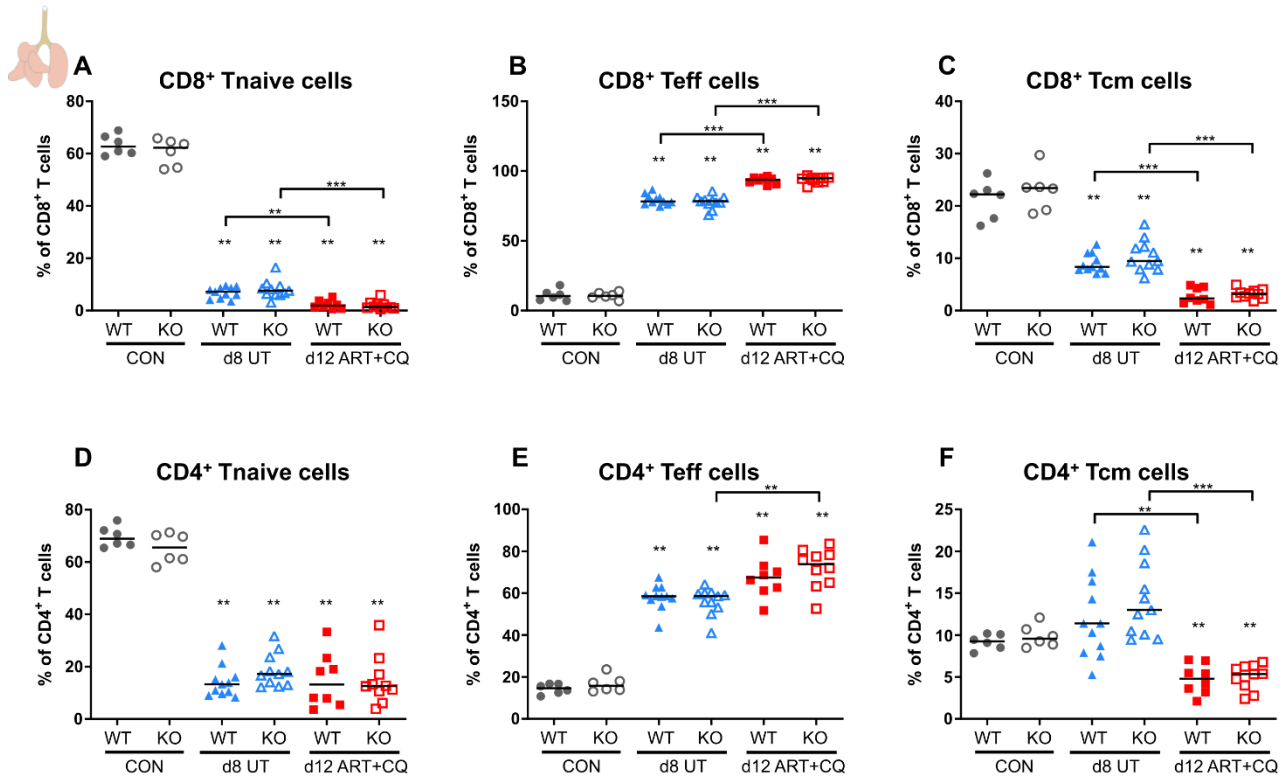

**Supplementary Figure 13. Activation status of pulmonary CD4<sup>+</sup> and CD8<sup>+</sup> T cells was not affected in CCR2 KO mice.**

CCR2 WT and CCR2 KO C57BL/6 mice were infected with *PbNK65*. Mice were injected daily from 8 until 12 days p.i. with 10 mg/kg ART + 30 mg/kg CQ. Mice were dissected at the indicated days p.i. Leukocytes were isolated from the lungs according to protocol 2 and flow cytometry was performed. (A-C) The percentages of Tnaive (CD44<sup>-</sup> CD62L<sup>+</sup>), Teff (CD44<sup>+</sup> CD62L<sup>-</sup>) and Tcm (CD44<sup>+</sup> CD62L<sup>+</sup>) of the total CD8<sup>+</sup> T cell population are shown. (D-F) The percentages of Tnaive (CD44<sup>-</sup> CD62L<sup>+</sup>), Teff (CD44<sup>+</sup> CD62L<sup>-</sup>) and Tcm (CD44<sup>+</sup> CD62L<sup>+</sup>) of the total CD4<sup>+</sup> T cell population are shown. Compilation of two experiments. Each symbol represents data of an individual mouse. n=6 for CON CCR2 WT, n=6 for CON CCR2 KO, n=11 for UT CCR2 WT, n=11 for UT CCR2 KO, n=8 for ART+CQ CCR2 WT, n=10 for ART+CQ CCR2 KO.

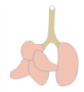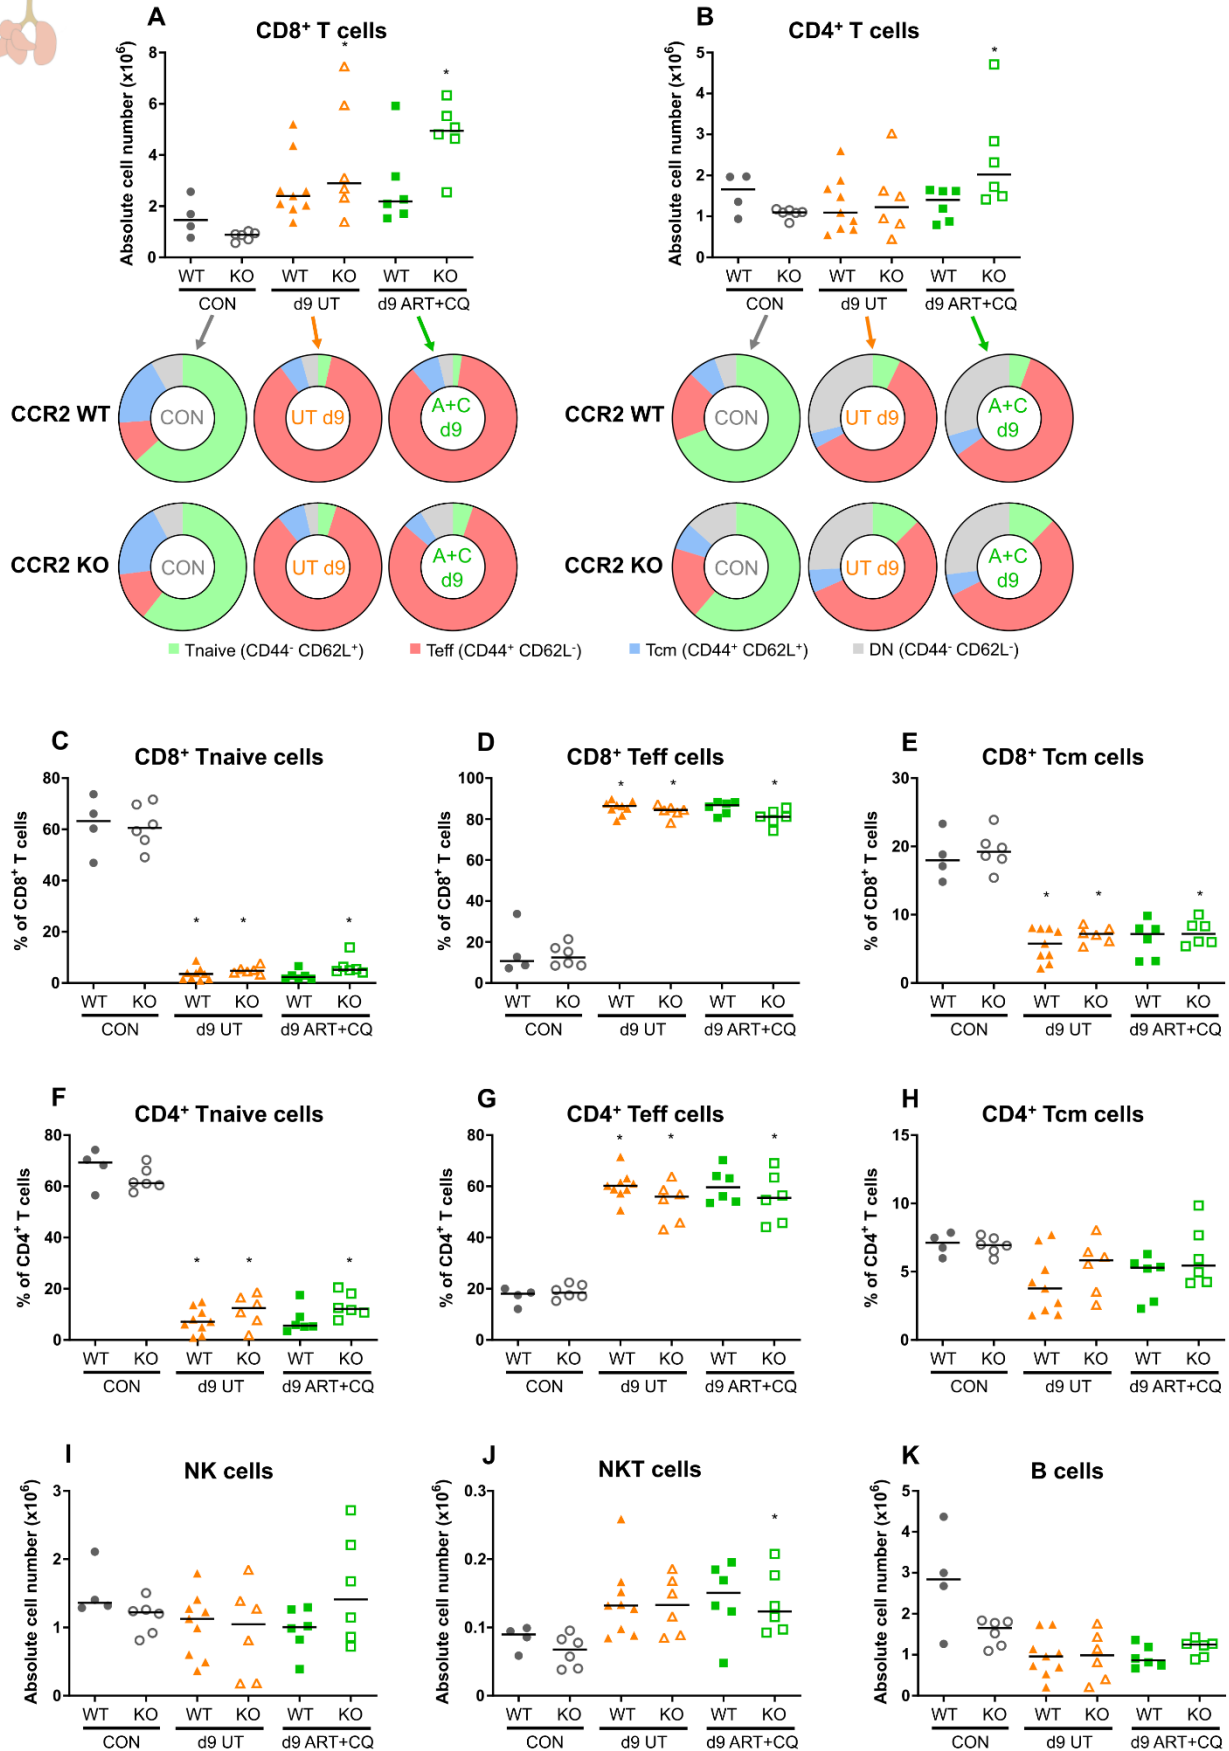



**Supplementary Figure 14. No effect of CCR2 gene knock-out was observed on the number of pulmonary lymphocytes at 9 days p.i.**

CCR2 WT and CCR2 KO C57BL/6 mice were infected with *PbNK65*. Mice were injected at 8 days p.i. with 10 mg/kg ART + 30 mg/kg CQ. Mice were dissected at the indicated days p.i. Leukocytes were isolated from the lungs according to protocol 2 and flow cytometry was performed. (A-H) The absolute numbers of CD8<sup>+</sup> T cells (CD45<sup>+</sup> CD3<sup>+</sup> NK1.1<sup>-</sup> CD8<sup>+</sup>) and CD4<sup>+</sup> T cells (CD45<sup>+</sup> CD3<sup>+</sup> NK1.1<sup>-</sup> CD4<sup>+</sup>) and the percentages of Tnaive (CD44<sup>-</sup> CD62L<sup>+</sup>), Teff (CD44<sup>+</sup> CD62L<sup>-</sup>) and Tcm (CD44<sup>+</sup> CD62L<sup>+</sup>) of the total cell population are shown. (I-K) The absolute numbers of NK cells (CD45<sup>+</sup> CD3<sup>-</sup> NK1.1<sup>+</sup>), NKT cells (CD45<sup>+</sup> CD3<sup>+</sup> NK1.1<sup>+</sup>) and B cells (CD45<sup>+</sup> CD3<sup>-</sup> NK1.1<sup>-</sup> B220<sup>+</sup>) were calculated. Compilation of two experiments, except ART+ CQ CCR2 WT and KO group only one experiment. Each symbol represents data of an individual mouse. n=4 for CON CCR2 WT, n=6 for CON CCR2 KO, n=9 for UT CCR2 WT, n=6 for UT CCR2 KO, n=6 for ART+CQ CCR2 WT, n=6 for ART+CQ CCR2 KO.

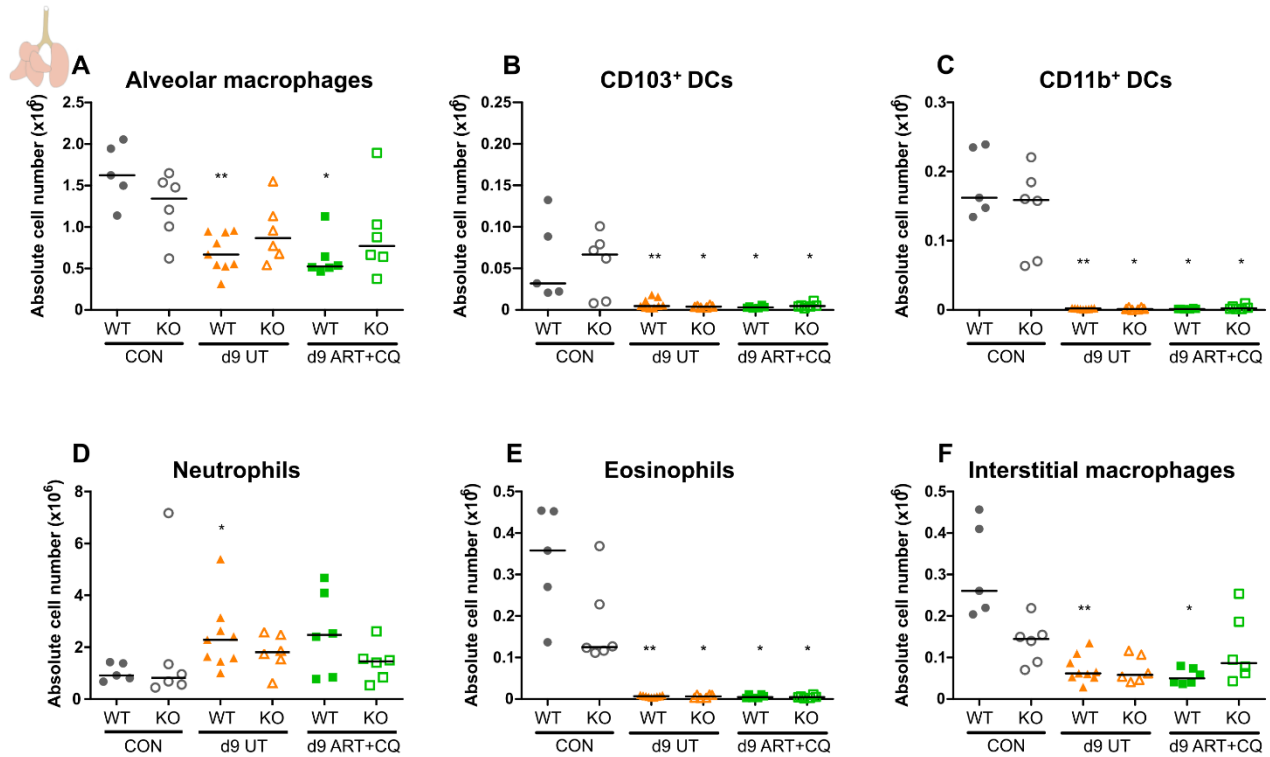

**Supplementary Figure 15. CCR2 gene knock-out had no effect on the number of myeloid cells present at 9 days p.i. in the lungs.**

CCR2 WT and CCR2 KO C57BL/6 mice were infected with *PbNK65*. Mice were injected at 8 days p.i. with 10 mg/kg ART + 30 mg/kg CQ. Mice were dissected at the indicated days p.i. Leukocytes were isolated from the lungs according to protocol 2 and flow cytometry was performed. (A-F) The absolute numbers of alveolar macrophages (AM; CD45<sup>+</sup> SiglecF<sup>+</sup> CD11b<sup>int</sup> CD11c<sup>+</sup>), CD103<sup>+</sup> dendritic cells (CD103<sup>+</sup> DCs; CD45<sup>+</sup> Lin<sup>-</sup> SiglecF<sup>-</sup> MHC-II<sup>+</sup> CD11c<sup>+</sup> CD103<sup>+</sup> CD11b<sup>-</sup>), CD11b<sup>+</sup> dendritic cells (CD11b<sup>+</sup> DCs; CD45<sup>+</sup> Lin<sup>-</sup> SiglecF<sup>-</sup> MHC-II<sup>+</sup> CD11c<sup>+</sup> CD103<sup>-</sup> CD11b<sup>+</sup> CD24<sup>+</sup> CD64<sup>-</sup>), neutrophils (Neutros; CD45<sup>+</sup> Lin<sup>-</sup> CD11b<sup>+</sup> Ly6G<sup>+</sup>), eosinophils (Eos; CD45<sup>+</sup> CD11b<sup>+</sup> SiglecF<sup>+</sup> CD11c<sup>-</sup>) and interstitial macrophages (IM; CD45<sup>+</sup> Lin<sup>-</sup> CD11b<sup>hi</sup> MHC-II<sup>+</sup> CD64<sup>+</sup> CD24<sup>-</sup>) present in the lungs were calculated. Compilation of two experiments, except ART+ CQ CCR2 WT and KO group only one experiment. Each symbol represents data of an individual mouse. n=5 for CON CCR2 WT, n=6 for CON CCR2 KO, n=9 for UT CCR2 WT, n=6 for UT CCR2 KO, n=6 for ART+CQ CCR2 WT, n=6 for ART+CQ CCR2 KO.

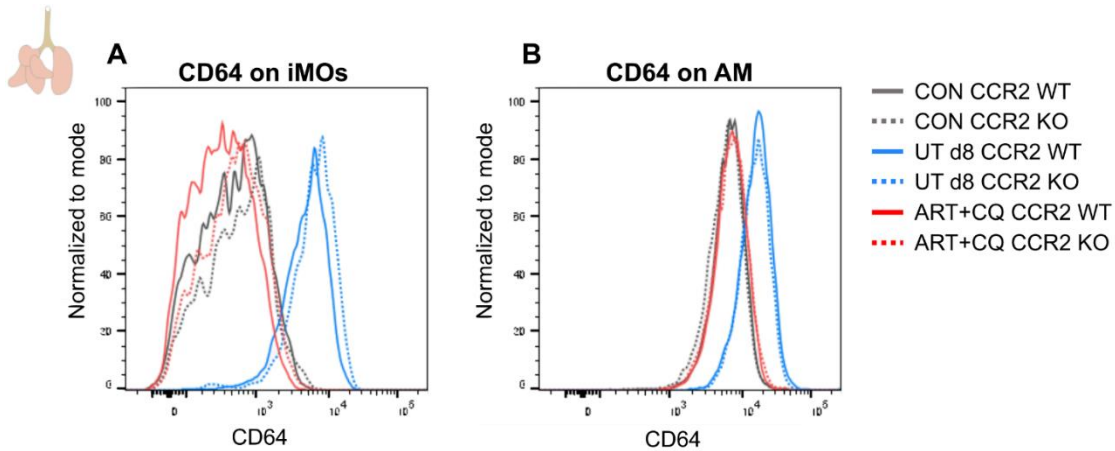

**Supplementary Figure 16. CD64 expression by iMOs and AM during resolution in CCR2 KO and WT mice.**

CCR2 WT and CCR2 KO C57BL/6 mice were infected with *PbNK65*. Mice were injected daily from 8 until 12 days p.i. with 10 mg/kg ART + 30 mg/kg CQ. Mice were dissected at the indicated days p.i. Leukocytes were isolated from the lungs according to protocol 2 and flow cytometry was performed. Representative histograms of the expression of CD64 on inflammatory monocytes (iMOs (A); CD45<sup>+</sup> Lin<sup>-</sup> CD11b<sup>hi</sup> MHC-II<sup>-</sup> Ly6C<sup>+</sup>) and alveolar macrophages (AM (B); CD45<sup>+</sup> SiglecF<sup>+</sup> CD11b<sup>int</sup> CD11c<sup>+</sup>) are shown.
